# Supplementary material for: Nutritional quality modulates trait variability
Source: Front Zool. 2018 Dec 5;15:50. doi: 10.1186/s12983-018-0297-2 (PMC6282258; doi:10.1186/s12983-018-0297-2)
Supplement: Supplementary file 1 — Raw data table. (XLSX 560 kb) [file 12983_2018_297_MOESM1_ESM.xlsx]

## Sheet: meta_data
Nutritional quality modulates trait variability
Adrian Brückner1,2,* Romina Schuster1, Katja Wehner1 and Michael Heethoff1,*
1Ecological Networks, Technische Univeristät Darmstadt, Schnittspahnstraße 3, 64287 Darmstadt, Germany
2Division of Biology and Biological Engineering, California Institute of Technology, 1200 E California Boulevard, Pasadena, CA 91125, United States of America
*Corresponding authors: heethoff@bio.tu-darmstadt.de, adrian.brueckner@gmail.com

## Sheet: life-history
ID	day (n)	EGG (n)	LAR (n)	PRO (n)	DEU (n)	TRI (n)	ADU (n)
blood_1	2	0	0	0	0	0	0
blood_10	2	0	0	0	0	0	0
blood_11	2	0	0	0	0	0	0
blood_12	2	0	0	0	0	0	0
blood_13	2	0	0	0	0	0	0
blood_14	2	0	0	0	0	0	0
blood_15	2	0	0	0	0	0	0
blood_16	2	0	0	0	0	0	0
blood_17	2	0	0	0	0	0	0
blood_18	2	0	0	0	0	0	0
blood_19	2	0	0	0	0	0	0
blood_2	2	0	0	0	0	0	0
blood_20	2	0	0	0	0	0	0
blood_21	2	0	0	0	0	0	0
blood_22	2	0	0	0	0	0	0
blood_23	2	0	0	0	0	0	0
blood_24	2	0	0	0	0	0	0
blood_25	2	0	0	0	0	0	0
blood_3	2	0	0	0	0	0	0
blood_4	2	0	0	0	0	0	0
blood_5	2	0	0	0	0	0	0
blood_6	2	0	0	0	0	0	0
blood_7	2	0	0	0	0	0	0
blood_8	2	0	0	0	0	0	0
blood_9	2	0	0	0	0	0	0
bone_1	2	0	0	0	0	0	0
bone_10	2	0	0	0	0	0	0
bone_11	2	0	0	0	0	0	0
bone_12	2	0	0	0	0	0	0
bone_13	2	0	0	0	0	0	0
bone_14	2	0	0	0	0	0	0
bone_15	2	0	0	0	0	0	0
bone_16	2	0	0	0	0	0	0
bone_17	2	0	0	0	0	0	0
bone_18	2	0	0	0	0	0	0
bone_19	2	0	0	0	0	0	0
bone_2	2	0	0	0	0	0	0
bone_20	2	0	0	0	0	0	0
bone_21	2	0	0	0	0	0	0
bone_22	2	0	0	0	0	0	0
bone_23	2	0	0	0	0	0	0
bone_24	2	0	0	0	0	0	0
bone_25	2	0	0	0	0	0	0
bone_3	2	0	0	0	0	0	0
bone_4	2	0	0	0	0	0	0
bone_5	2	0	0	0	0	0	0
bone_6	2	0	0	0	0	0	0
bone_7	2	0	0	0	0	0	0
bone_8	2	0	0	0	0	0	0
bone_9	2	0	0	0	0	0	0
chlor_1	2	0	0	0	0	0	0
chlor_10	2	0	0	0	0	0	0
chlor_11	2	0	0	0	0	0	0
chlor_12	2	0	0	0	0	0	0
chlor_13	2	0	0	0	0	0	0
chlor_14	2	0	0	0	0	0	0
chlor_15	2	0	0	0	0	0	0
chlor_16	2	0	0	0	0	0	0
chlor_17	2	0	0	0	0	0	0
chlor_18	2	0	0	0	0	0	0
chlor_19	2	0	0	0	0	0	0
chlor_2	2	0	0	0	0	0	0
chlor_20	2	0	0	0	0	0	0
chlor_21	2	0	0	0	0	0	0
chlor_22	2	0	0	0	0	0	0
chlor_23	2	0	0	0	0	0	0
chlor_24	2	0	0	0	0	0	0
chlor_25	2	0	0	0	0	0	0
chlor_3	2	0	0	0	0	0	0
chlor_4	2	0	0	0	0	0	0
chlor_5	2	0	0	0	0	0	0
chlor_6	2	0	0	0	0	0	0
chlor_7	2	0	0	0	0	0	0
chlor_8	2	0	0	0	0	0	0
chlor_9	2	0	0	0	0	0	0
fungi_1	2	0	0	0	0	0	0
fungi_10	2	0	0	0	0	0	0
fungi_11	2	0	0	0	0	0	0
fungi_12	2	0	0	0	0	0	0
fungi_13	2	0	0	0	0	0	0
fungi_14	2	0	0	0	0	0	0
fungi_15	2	0	0	0	0	0	0
fungi_16	2	0	0	0	0	0	0
fungi_17	2	0	0	0	0	0	0
fungi_18	2	0	0	0	0	0	0
fungi_19	2	0	0	0	0	0	0
fungi_2	2	0	0	0	0	0	0
fungi_20	2	0	0	0	0	0	0
fungi_21	2	0	0	0	0	0	0
fungi_22	2	0	0	0	0	0	0
fungi_23	2	0	0	0	0	0	0
fungi_24	2	0	0	0	0	0	0
fungi_25	2	0	0	0	0	0	0
fungi_3	2	0	0	0	0	0	0
fungi_4	2	0	0	0	0	0	0
fungi_5	2	0	0	0	0	0	0
fungi_6	2	0	0	0	0	0	0
fungi_7	2	0	0	0	0	0	0
fungi_8	2	0	0	0	0	0	0
fungi_9	2	0	0	0	0	0	0
hemp_1	2	0	0	0	0	0	0
hemp_10	2	0	0	0	0	0	0
hemp_11	2	0	0	0	0	0	0
hemp_12	2	0	0	0	0	0	0
hemp_13	2	0	0	0	0	0	0
hemp_14	2	0	0	0	0	0	0
hemp_15	2	0	0	0	0	0	0
hemp_16	2	0	0	0	0	0	0
hemp_17	2	0	0	0	0	0	0
hemp_18	2	0	0	0	0	0	0
hemp_19	2	0	0	0	0	0	0
hemp_2	2	0	0	0	0	0	0
hemp_20	2	0	0	0	0	0	0
hemp_21	2	0	0	0	0	0	0
hemp_22	2	0	0	0	0	0	0
hemp_23	2	0	0	0	0	0	0
hemp_24	2	0	0	0	0	0	0
hemp_25	2	0	0	0	0	0	0
hemp_3	2	0	0	0	0	0	0
hemp_4	2	0	0	0	0	0	0
hemp_5	2	0	0	0	0	0	0
hemp_6	2	0	0	0	0	0	0
hemp_7	2	0	0	0	0	0	0
hemp_8	2	0	0	0	0	0	0
hemp_9	2	0	0	0	0	0	0
lupine_1	2	0	0	0	0	0	0
lupine_10	2	0	0	0	0	0	0
lupine_11	2	0	0	0	0	0	0
lupine_12	2	0	0	0	0	0	0
lupine_13	2	0	0	0	0	0	0
lupine_14	2	0	0	0	0	0	0
lupine_15	2	0	0	0	0	0	0
lupine_16	2	0	0	0	0	0	0
lupine_17	2	0	0	0	0	0	0
lupine_18	2	0	0	0	0	0	0
lupine_19	2	0	0	0	0	0	0
lupine_2	2	0	0	0	0	0	0
lupine_20	2	0	0	0	0	0	0
lupine_21	2	0	0	0	0	0	0
lupine_22	2	0	0	0	0	0	0
lupine_23	2	0	0	0	0	0	0
lupine_24	2	0	0	0	0	0	0
lupine_25	2	0	0	0	0	0	0
lupine_3	2	0	0	0	0	0	0
lupine_4	2	0	0	0	0	0	0
lupine_5	2	0	0	0	0	0	0
lupine_6	2	0	0	0	0	0	0
lupine_7	2	0	0	0	0	0	0
lupine_8	2	0	0	0	0	0	0
lupine_9	2	0	0	0	0	0	0
pollen_1	2	0	0	0	0	0	0
pollen_10	2	0	0	0	0	0	0
pollen_11	2	0	0	0	0	0	0
pollen_12	2	0	0	0	0	0	0
pollen_13	2	0	0	0	0	0	0
pollen_14	2	0	0	0	0	0	0
pollen_15	2	0	0	0	0	0	0
pollen_16	2	0	0	0	0	0	0
pollen_17	2	0	0	0	0	0	0
pollen_18	2	0	0	0	0	0	0
pollen_19	2	0	0	0	0	0	0
pollen_2	2	0	0	0	0	0	0
pollen_20	2	0	0	0	0	0	0
pollen_21	2	0	0	0	0	0	0
pollen_22	2	0	0	0	0	0	0
pollen_23	2	0	0	0	0	0	0
pollen_24	2	0	0	0	0	0	0
pollen_25	2	0	0	0	0	0	0
pollen_3	2	0	0	0	0	0	0
pollen_4	2	0	0	0	0	0	0
pollen_5	2	0	0	0	0	0	0
pollen_6	2	0	0	0	0	0	0
pollen_7	2	0	0	0	0	0	0
pollen_8	2	0	0	0	0	0	0
pollen_9	2	0	0	0	0	0	0
spiru_1	2	0	0	0	0	0	0
spiru_10	2	0	0	0	0	0	0
spiru_11	2	0	0	0	0	0	0
spiru_12	2	0	0	0	0	0	0
spiru_13	2	0	0	0	0	0	0
spiru_14	2	0	0	0	0	0	0
spiru_15	2	0	0	0	0	0	0
spiru_16	2	0	0	0	0	0	0
spiru_17	2	0	0	0	0	0	0
spiru_18	2	0	0	0	0	0	0
spiru_19	2	0	0	0	0	0	0
spiru_2	2	0	0	0	0	0	0
spiru_20	2	0	0	0	0	0	0
spiru_21	2	0	0	0	0	0	0
spiru_22	2	0	0	0	0	0	0
spiru_23	2	0	0	0	0	0	0
spiru_24	2	0	0	0	0	0	0
spiru_25	2	0	0	0	0	0	0
spiru_3	2	0	0	0	0	0	0
spiru_4	2	0	0	0	0	0	0
spiru_5	2	0	0	0	0	0	0
spiru_6	2	0	0	0	0	0	0
spiru_7	2	0	0	0	0	0	0
spiru_8	2	0	0	0	0	0	0
spiru_9	2	0	0	0	0	0	0
wheat_1	2	0	0	0	0	0	0
wheat_10	2	0	0	0	0	0	0
wheat_11	2	0	0	0	0	0	0
wheat_12	2	0	0	0	0	0	0
wheat_13	2	0	0	0	0	0	0
wheat_14	2	0	0	0	0	0	0
wheat_15	2	0	0	0	0	0	0
wheat_16	2	0	0	0	0	0	0
wheat_17	2	0	0	0	0	0	0
wheat_18	2	0	0	0	0	0	0
wheat_19	2	0	0	0	0	0	0
wheat_2	2	0	0	0	0	0	0
wheat_20	2	0	0	0	0	0	0
wheat_21	2	0	0	0	0	0	0
wheat_22	2	0	0	0	0	0	0
wheat_23	2	0	0	0	0	0	0
wheat_24	2	0	0	0	0	0	0
wheat_25	2	0	0	0	0	0	0
wheat_3	2	0	0	0	0	0	0
wheat_4	2	0	0	0	0	0	0
wheat_5	2	0	0	0	0	0	0
wheat_6	2	0	0	0	0	0	0
wheat_7	2	0	0	0	0	0	0
wheat_8	2	0	0	0	0	0	0
wheat_9	2	0	0	0	0	0	0
yeast_1	2	0	0	0	0	0	0
yeast_10	2	0	0	0	0	0	0
yeast_11	2	0	0	0	0	0	0
yeast_12	2	0	0	0	0	0	0
yeast_13	2	0	0	0	0	0	0
yeast_14	2	0	0	0	0	0	0
yeast_15	2	0	0	0	0	0	0
yeast_16	2	0	0	0	0	0	0
yeast_17	2	0	0	0	0	0	0
yeast_18	2	0	0	0	0	0	0
yeast_19	2	0	0	0	0	0	0
yeast_2	2	0	0	0	0	0	0
yeast_20	2	0	0	0	0	0	0
yeast_21	2	0	0	0	0	0	0
yeast_22	2	0	0	0	0	0	0
yeast_23	2	0	0	0	0	0	0
yeast_24	2	0	0	0	0	0	0
yeast_25	2	0	0	0	0	0	0
yeast_3	2	0	0	0	0	0	0
yeast_4	2	0	0	0	0	0	0
yeast_5	2	0	0	0	0	0	0
yeast_6	2	0	0	0	0	0	0
yeast_7	2	0	0	0	0	0	0
yeast_8	2	0	0	0	0	0	0
yeast_9	2	0	0	0	0	0	0
blood_1	3	0	0	0	0	0	0
blood_10	3	0	0	0	0	0	0
blood_11	3	0	0	0	0	0	0
blood_12	3	0	0	0	0	0	0
blood_13	3	0	0	0	0	0	0
blood_14	3	0	0	0	0	0	0
blood_15	3	0	0	0	0	0	0
blood_16	3	0	0	0	0	0	0
blood_17	3	0	0	0	0	0	0
blood_18	3	0	0	0	0	0	0
blood_19	3	0	0	0	0	0	0
blood_2	3	0	0	0	0	0	0
blood_20	3	0	0	0	0	0	0
blood_21	3	0	0	0	0	0	0
blood_22	3	0	0	0	0	0	0
blood_23	3	0	0	0	0	0	0
blood_24	3	0	0	0	0	0	0
blood_25	3	0	0	0	0	0	0
blood_3	3	0	0	0	0	0	0
blood_4	3	0	0	0	0	0	0
blood_5	3	0	0	0	0	0	0
blood_6	3	0	0	0	0	0	0
blood_7	3	0	0	0	0	0	0
blood_8	3	0	0	0	0	0	0
blood_9	3	0	0	0	0	0	0
bone_1	3	0	0	0	0	0	0
bone_10	3	0	0	0	0	0	0
bone_11	3	0	0	0	0	0	0
bone_12	3	0	0	0	0	0	0
bone_13	3	0	0	0	0	0	0
bone_14	3	0	0	0	0	0	0
bone_15	3	0	0	0	0	0	0
bone_16	3	0	0	0	0	0	0
bone_17	3	0	0	0	0	0	0
bone_18	3	0	0	0	0	0	0
bone_19	3	0	0	0	0	0	0
bone_2	3	0	0	0	0	0	0
bone_20	3	0	0	0	0	0	0
bone_21	3	0	0	0	0	0	0
bone_22	3	0	0	0	0	0	0
bone_23	3	0	0	0	0	0	0
bone_24	3	0	0	0	0	0	0
bone_25	3	0	0	0	0	0	0
bone_3	3	0	0	0	0	0	0
bone_4	3	0	0	0	0	0	0
bone_5	3	0	0	0	0	0	0
bone_6	3	0	0	0	0	0	0
bone_7	3	0	0	0	0	0	0
bone_8	3	0	0	0	0	0	0
bone_9	3	0	0	0	0	0	0
chlor_1	3	0	0	0	0	0	0
chlor_10	3	0	0	0	0	0	0
chlor_11	3	0	0	0	0	0	0
chlor_12	3	0	0	0	0	0	0
chlor_13	3	0	0	0	0	0	0
chlor_14	3	0	0	0	0	0	0
chlor_15	3	0	0	0	0	0	0
chlor_16	3	2	2	0	0	0	0
chlor_17	3	0	0	0	0	0	0
chlor_18	3	0	0	0	0	0	0
chlor_19	3	0	0	0	0	0	0
chlor_2	3	0	0	0	0	0	0
chlor_20	3	0	0	0	0	0	0
chlor_21	3	0	0	0	0	0	0
chlor_22	3	0	0	0	0	0	0
chlor_23	3	0	0	0	0	0	0
chlor_24	3	0	0	0	0	0	0
chlor_25	3	0	0	0	0	0	0
chlor_3	3	0	0	0	0	0	0
chlor_4	3	0	0	0	0	0	0
chlor_5	3	0	0	0	0	0	0
chlor_6	3	0	0	0	0	0	0
chlor_7	3	0	0	0	0	0	0
chlor_8	3	0	0	0	0	0	0
chlor_9	3	0	0	0	0	0	0
fungi_1	3	0	0	0	0	0	0
fungi_10	3	0	0	0	0	0	0
fungi_11	3	0	0	0	0	0	0
fungi_12	3	0	0	0	0	0	0
fungi_13	3	0	0	0	0	0	0
fungi_14	3	0	0	0	0	0	0
fungi_15	3	0	0	0	0	0	0
fungi_16	3	0	0	0	0	0	0
fungi_17	3	0	0	0	0	0	0
fungi_18	3	0	0	0	0	0	0
fungi_19	3	3	0	0	0	0	0
fungi_2	3	0	0	0	0	0	0
fungi_20	3	0	0	0	0	0	0
fungi_21	3	0	0	0	0	0	0
fungi_22	3	0	0	0	0	0	0
fungi_23	3	0	0	0	0	0	0
fungi_24	3	0	0	0	0	0	0
fungi_25	3	0	0	0	0	0	0
fungi_3	3	0	0	0	0	0	0
fungi_4	3	0	0	0	0	0	0
fungi_5	3	0	0	0	0	0	0
fungi_6	3	0	0	0	0	0	0
fungi_7	3	0	0	0	0	0	0
fungi_8	3	0	0	0	0	0	0
fungi_9	3	0	0	0	0	0	0
hemp_1	3	5	0	0	0	0	0
hemp_10	3	0	0	0	0	0	0
hemp_11	3	0	0	0	0	0	0
hemp_12	3	0	0	0	0	0	0
hemp_13	3	0	0	0	0	0	0
hemp_14	3	0	0	0	0	0	0
hemp_15	3	0	0	0	0	0	0
hemp_16	3	12	0	0	0	0	0
hemp_17	3	0	0	0	0	0	0
hemp_18	3	0	0	0	0	0	0
hemp_19	3	0	0	0	0	0	0
hemp_2	3	4	4	0	0	0	0
hemp_20	3	0	0	0	0	0	0
hemp_21	3	1	1	0	0	0	0
hemp_22	3	0	0	0	0	0	0
hemp_23	3	0	0	0	0	0	0
hemp_24	3	0	0	0	0	0	0
hemp_25	3	0	0	0	0	0	0
hemp_3	3	0	0	0	0	0	0
hemp_4	3	0	0	0	0	0	0
hemp_5	3	0	0	0	0	0	0
hemp_6	3	0	0	0	0	0	0
hemp_7	3	0	0	0	0	0	0
hemp_8	3	0	0	0	0	0	0
hemp_9	3	2	2	0	0	0	0
lupine_1	3	0	0	0	0	0	0
lupine_10	3	0	0	0	0	0	0
lupine_11	3	0	0	0	0	0	0
lupine_12	3	0	0	0	0	0	0
lupine_13	3	0	0	0	0	0	0
lupine_14	3	0	0	0	0	0	0
lupine_15	3	11	0	0	0	0	0
lupine_16	3	0	0	0	0	0	0
lupine_17	3	0	0	0	0	0	0
lupine_18	3	0	0	0	0	0	0
lupine_19	3	0	0	0	0	0	0
lupine_2	3	0	0	0	0	0	0
lupine_20	3	0	0	0	0	0	0
lupine_21	3	0	0	0	0	0	0
lupine_22	3	0	0	0	0	0	0
lupine_23	3	0	0	0	0	0	0
lupine_24	3	0	0	0	0	0	0
lupine_25	3	0	0	0	0	0	0
lupine_3	3	0	0	0	0	0	0
lupine_4	3	0	0	0	0	0	0
lupine_5	3	0	0	0	0	0	0
lupine_6	3	0	0	0	0	0	0
lupine_7	3	0	0	0	0	0	0
lupine_8	3	0	0	0	0	0	0
lupine_9	3	0	0	0	0	0	0
pollen_1	3	0	0	0	0	0	0
pollen_10	3	0	0	0	0	0	0
pollen_11	3	0	0	0	0	0	0
pollen_12	3	0	0	0	0	0	0
pollen_13	3	0	0	0	0	0	0
pollen_14	3	0	0	0	0	0	0
pollen_15	3	0	0	0	0	0	0
pollen_16	3	0	0	0	0	0	0
pollen_17	3	0	0	0	0	0	0
pollen_18	3	0	0	0	0	0	0
pollen_19	3	0	0	0	0	0	0
pollen_2	3	0	0	0	0	0	0
pollen_20	3	0	0	0	0	0	0
pollen_21	3	0	0	0	0	0	0
pollen_22	3	0	0	0	0	0	0
pollen_23	3	0	0	0	0	0	0
pollen_24	3	0	0	0	0	0	0
pollen_25	3	0	0	0	0	0	0
pollen_3	3	0	0	0	0	0	0
pollen_4	3	0	0	0	0	0	0
pollen_5	3	0	0	0	0	0	0
pollen_6	3	0	0	0	0	0	0
pollen_7	3	2	0	0	0	0	0
pollen_8	3	0	0	0	0	0	0
pollen_9	3	0	0	0	0	0	0
spiru_1	3	0	0	0	0	0	0
spiru_10	3	0	0	0	0	0	0
spiru_11	3	0	0	0	0	0	0
spiru_12	3	0	0	0	0	0	0
spiru_13	3	0	0	0	0	0	0
spiru_14	3	0	0	0	0	0	0
spiru_15	3	0	0	0	0	0	0
spiru_16	3	0	0	0	0	0	0
spiru_17	3	0	0	0	0	0	0
spiru_18	3	0	0	0	0	0	0
spiru_19	3	0	0	0	0	0	0
spiru_2	3	0	0	0	0	0	0
spiru_20	3	0	0	0	0	0	0
spiru_21	3	0	0	0	0	0	0
spiru_22	3	0	0	0	0	0	0
spiru_23	3	0	0	0	0	0	0
spiru_24	3	0	0	0	0	0	0
spiru_25	3	0	0	0	0	0	0
spiru_3	3	0	0	0	0	0	0
spiru_4	3	0	0	0	0	0	0
spiru_5	3	0	0	0	0	0	0
spiru_6	3	0	0	0	0	0	0
spiru_7	3	0	0	0	0	0	0
spiru_8	3	0	0	0	0	0	0
spiru_9	3	0	0	0	0	0	0
wheat_1	3	0	0	0	0	0	0
wheat_10	3	0	0	0	0	0	0
wheat_11	3	0	0	0	0	0	0
wheat_12	3	0	0	0	0	0	0
wheat_13	3	0	0	0	0	0	0
wheat_14	3	0	0	0	0	0	0
wheat_15	3	0	0	0	0	0	0
wheat_16	3	0	0	0	0	0	0
wheat_17	3	0	0	0	0	0	0
wheat_18	3	0	0	0	0	0	0
wheat_19	3	0	0	0	0	0	0
wheat_2	3	0	0	0	0	0	0
wheat_20	3	0	0	0	0	0	0
wheat_21	3	0	0	0	0	0	0
wheat_22	3	0	0	0	0	0	0
wheat_23	3	0	0	0	0	0	0
wheat_24	3	0	0	0	0	0	0
wheat_25	3	0	0	0	0	0	0
wheat_3	3	0	0	0	0	0	0
wheat_4	3	0	0	0	0	0	0
wheat_5	3	0	0	0	0	0	0
wheat_6	3	0	0	0	0	0	0
wheat_7	3	0	0	0	0	0	0
wheat_8	3	0	0	0	0	0	0
wheat_9	3	0	0	0	0	0	0
yeast_1	3	0	0	0	0	0	0
yeast_10	3	0	0	0	0	0	0
yeast_11	3	0	0	0	0	0	0
yeast_12	3	0	0	0	0	0	0
yeast_13	3	0	0	0	0	0	0
yeast_14	3	0	0	0	0	0	0
yeast_15	3	0	0	0	0	0	0
yeast_16	3	0	0	0	0	0	0
yeast_17	3	0	0	0	0	0	0
yeast_18	3	1	0	0	0	0	0
yeast_19	3	0	0	0	0	0	0
yeast_2	3	0	0	0	0	0	0
yeast_20	3	0	0	0	0	0	0
yeast_21	3	0	0	0	0	0	0
yeast_22	3	0	0	0	0	0	0
yeast_23	3	0	0	0	0	0	0
yeast_24	3	0	0	0	0	0	0
yeast_25	3	0	0	0	0	0	0
yeast_3	3	0	0	0	0	0	0
yeast_4	3	0	0	0	0	0	0
yeast_5	3	0	0	0	0	0	0
yeast_6	3	0	0	0	0	0	0
yeast_7	3	0	0	0	0	0	0
yeast_8	3	0	0	0	0	0	0
yeast_9	3	0	0	0	0	0	0
blood_1	4	0	0	0	0	0	0
blood_10	4	0	0	0	0	0	0
blood_11	4	0	0	0	0	0	0
blood_12	4	0	0	0	0	0	0
blood_13	4	0	0	0	0	0	0
blood_14	4	0	0	0	0	0	0
blood_15	4	0	0	0	0	0	0
blood_16	4	0	0	0	0	0	0
blood_17	4	0	0	0	0	0	0
blood_18	4	0	0	0	0	0	0
blood_19	4	0	0	0	0	0	0
blood_2	4	0	0	0	0	0	0
blood_20	4	0	0	0	0	0	0
blood_21	4	0	0	0	0	0	0
blood_22	4	0	0	0	0	0	0
blood_23	4	0	0	0	0	0	0
blood_24	4	0	0	0	0	0	0
blood_25	4	0	0	0	0	0	0
blood_3	4	0	0	0	0	0	0
blood_4	4	0	0	0	0	0	0
blood_5	4	0	0	0	0	0	0
blood_6	4	0	0	0	0	0	0
blood_7	4	0	0	0	0	0	0
blood_8	4	0	0	0	0	0	0
blood_9	4	0	0	0	0	0	0
bone_1	4	0	0	0	0	0	0
bone_10	4	0	0	0	0	0	0
bone_11	4	0	0	0	0	0	0
bone_12	4	0	0	0	0	0	0
bone_13	4	0	0	0	0	0	0
bone_14	4	0	0	0	0	0	0
bone_15	4	0	0	0	0	0	0
bone_16	4	0	0	0	0	0	0
bone_17	4	0	0	0	0	0	0
bone_18	4	0	0	0	0	0	0
bone_19	4	0	0	0	0	0	0
bone_2	4	0	0	0	0	0	0
bone_20	4	0	0	0	0	0	0
bone_21	4	0	0	0	0	0	0
bone_22	4	0	0	0	0	0	0
bone_23	4	0	0	0	0	0	0
bone_24	4	0	0	0	0	0	0
bone_25	4	0	0	0	0	0	0
bone_3	4	0	0	0	0	0	0
bone_4	4	0	0	0	0	0	0
bone_5	4	0	0	0	0	0	0
bone_6	4	0	0	0	0	0	0
bone_7	4	0	0	0	0	0	0
bone_8	4	0	0	0	0	0	0
bone_9	4	0	0	0	0	0	0
chlor_1	4	0	0	0	0	0	0
chlor_10	4	0	0	0	0	0	0
chlor_11	4	0	0	0	0	0	0
chlor_12	4	0	0	0	0	0	0
chlor_13	4	0	0	0	0	0	0
chlor_14	4	0	0	0	0	0	0
chlor_15	4	0	0	0	0	0	0
chlor_16	4	0	0	0	0	0	0
chlor_17	4	0	0	0	0	0	0
chlor_18	4	0	0	0	0	0	0
chlor_19	4	0	0	0	0	0	0
chlor_2	4	0	0	0	0	0	0
chlor_20	4	0	0	0	0	0	0
chlor_21	4	0	0	0	0	0	0
chlor_22	4	0	0	0	0	0	0
chlor_23	4	0	0	0	0	0	0
chlor_24	4	0	0	0	0	0	0
chlor_25	4	0	0	0	0	0	0
chlor_3	4	0	0	0	0	0	0
chlor_4	4	0	0	0	0	0	0
chlor_5	4	0	0	0	0	0	0
chlor_6	4	0	0	0	0	0	0
chlor_7	4	0	0	0	0	0	0
chlor_8	4	0	0	0	0	0	0
chlor_9	4	0	0	0	0	0	0
fungi_1	4	0	0	0	0	0	0
fungi_10	4	0	0	0	0	0	0
fungi_11	4	0	0	0	0	0	0
fungi_12	4	0	0	0	0	0	0
fungi_13	4	0	0	0	0	0	0
fungi_14	4	0	0	0	0	0	0
fungi_15	4	0	0	0	0	0	0
fungi_16	4	0	0	0	0	0	0
fungi_17	4	0	0	0	0	0	0
fungi_18	4	0	0	0	0	0	0
fungi_19	4	3	0	0	0	0	0
fungi_2	4	0	0	0	0	0	0
fungi_20	4	0	0	0	0	0	0
fungi_21	4	0	0	0	0	0	0
fungi_22	4	0	0	0	0	0	0
fungi_23	4	0	0	0	0	0	0
fungi_24	4	0	0	0	0	0	0
fungi_25	4	0	0	0	0	0	0
fungi_3	4	0	0	0	0	0	0
fungi_4	4	0	0	0	0	0	0
fungi_5	4	0	0	0	0	0	0
fungi_6	4	0	0	0	0	0	0
fungi_7	4	0	0	0	0	0	0
fungi_8	4	0	0	0	0	0	0
fungi_9	4	0	0	0	0	0	0
hemp_1	4	5	1	0	0	0	0
hemp_10	4	0	0	0	0	0	0
hemp_11	4	0	0	0	0	0	0
hemp_12	4	0	0	0	0	0	0
hemp_13	4	0	0	0	0	0	0
hemp_14	4	0	0	0	0	0	0
hemp_15	4	0	0	0	0	0	0
hemp_16	4	11	0	0	0	0	0
hemp_17	4	0	0	0	0	0	0
hemp_18	4	0	0	0	0	0	0
hemp_19	4	0	0	0	0	0	0
hemp_2	4	0	0	0	0	0	0
hemp_20	4	0	0	0	0	0	0
hemp_21	4	0	0	0	0	0	0
hemp_22	4	0	0	0	0	0	0
hemp_23	4	0	0	0	0	0	0
hemp_24	4	9	0	0	0	0	0
hemp_25	4	0	0	0	0	0	0
hemp_3	4	0	0	0	0	0	0
hemp_4	4	0	0	0	0	0	0
hemp_5	4	0	0	0	0	0	0
hemp_6	4	0	0	0	0	0	0
hemp_7	4	0	0	0	0	0	0
hemp_8	4	0	0	0	0	0	0
hemp_9	4	0	0	0	0	0	0
lupine_1	4	0	0	0	0	0	0
lupine_10	4	0	0	0	0	0	0
lupine_11	4	0	0	0	0	0	0
lupine_12	4	0	0	0	0	0	0
lupine_13	4	0	0	0	0	0	0
lupine_14	4	0	0	0	0	0	0
lupine_15	4	11	0	0	0	0	0
lupine_16	4	0	0	0	0	0	0
lupine_17	4	0	0	0	0	0	0
lupine_18	4	0	0	0	0	0	0
lupine_19	4	0	0	0	0	0	0
lupine_2	4	0	0	0	0	0	0
lupine_20	4	0	0	0	0	0	0
lupine_21	4	0	0	0	0	0	0
lupine_22	4	0	0	0	0	0	0
lupine_23	4	0	0	0	0	0	0
lupine_24	4	0	0	0	0	0	0
lupine_25	4	0	0	0	0	0	0
lupine_3	4	0	0	0	0	0	0
lupine_4	4	0	0	0	0	0	0
lupine_5	4	0	0	0	0	0	0
lupine_6	4	0	0	0	0	0	0
lupine_7	4	0	0	0	0	0	0
lupine_8	4	0	0	0	0	0	0
lupine_9	4	0	0	0	0	0	0
pollen_1	4	0	0	0	0	0	0
pollen_10	4	0	0	0	0	0	0
pollen_11	4	0	0	0	0	0	0
pollen_12	4	0	0	0	0	0	0
pollen_13	4	0	0	0	0	0	0
pollen_14	4	0	0	0	0	0	0
pollen_15	4	0	0	0	0	0	0
pollen_16	4	16	0	0	0	0	0
pollen_17	4	0	0	0	0	0	0
pollen_18	4	0	0	0	0	0	0
pollen_19	4	0	0	0	0	0	0
pollen_2	4	0	0	0	0	0	0
pollen_20	4	0	0	0	0	0	0
pollen_21	4	0	0	0	0	0	0
pollen_22	4	0	0	0	0	0	0
pollen_23	4	0	0	0	0	0	0
pollen_24	4	0	0	0	0	0	0
pollen_25	4	0	0	0	0	0	0
pollen_3	4	0	0	0	0	0	0
pollen_4	4	0	0	0	0	0	0
pollen_5	4	0	0	0	0	0	0
pollen_6	4	0	0	0	0	0	0
pollen_7	4	2	0	0	0	0	0
pollen_8	4	0	0	0	0	0	0
pollen_9	4	0	0	0	0	0	0
spiru_1	4	0	0	0	0	0	0
spiru_10	4	0	0	0	0	0	0
spiru_11	4	0	0	0	0	0	0
spiru_12	4	0	0	0	0	0	0
spiru_13	4	0	0	0	0	0	0
spiru_14	4	0	0	0	0	0	0
spiru_15	4	0	0	0	0	0	0
spiru_16	4	0	0	0	0	0	0
spiru_17	4	0	0	0	0	0	0
spiru_18	4	0	0	0	0	0	0
spiru_19	4	0	0	0	0	0	0
spiru_2	4	0	0	0	0	0	0
spiru_20	4	0	0	0	0	0	0
spiru_21	4	0	0	0	0	0	0
spiru_22	4	0	0	0	0	0	0
spiru_23	4	0	0	0	0	0	0
spiru_24	4	0	0	0	0	0	0
spiru_25	4	0	0	0	0	0	0
spiru_3	4	0	0	0	0	0	0
spiru_4	4	0	0	0	0	0	0
spiru_5	4	0	0	0	0	0	0
spiru_6	4	0	0	0	0	0	0
spiru_7	4	0	0	0	0	0	0
spiru_8	4	0	0	0	0	0	0
spiru_9	4	0	0	0	0	0	0
wheat_1	4	0	0	0	0	0	0
wheat_10	4	0	0	0	0	0	0
wheat_11	4	0	0	0	0	0	0
wheat_12	4	0	0	0	0	0	0
wheat_13	4	0	0	0	0	0	0
wheat_14	4	0	0	0	0	0	0
wheat_15	4	0	0	0	0	0	0
wheat_16	4	0	0	0	0	0	0
wheat_17	4	0	0	0	0	0	0
wheat_18	4	0	0	0	0	0	0
wheat_19	4	0	0	0	0	0	0
wheat_2	4	0	0	0	0	0	0
wheat_20	4	0	0	0	0	0	0
wheat_21	4	0	0	0	0	0	0
wheat_22	4	0	0	0	0	0	0
wheat_23	4	0	0	0	0	0	0
wheat_24	4	0	0	0	0	0	0
wheat_25	4	0	0	0	0	0	0
wheat_3	4	0	0	0	0	0	0
wheat_4	4	0	0	0	0	0	0
wheat_5	4	0	0	0	0	0	0
wheat_6	4	0	0	0	0	0	0
wheat_7	4	0	0	0	0	0	0
wheat_8	4	0	0	0	0	0	0
wheat_9	4	0	0	0	0	0	0
yeast_1	4	0	0	0	0	0	0
yeast_10	4	0	0	0	0	0	0
yeast_11	4	0	0	0	0	0	0
yeast_12	4	1	1	0	0	0	0
yeast_13	4	0	0	0	0	0	0
yeast_14	4	0	0	0	0	0	0
yeast_15	4	0	0	0	0	0	0
yeast_16	4	0	0	0	0	0	0
yeast_17	4	0	0	0	0	0	0
yeast_18	4	0	0	0	0	0	0
yeast_19	4	0	0	0	0	0	0
yeast_2	4	0	0	0	0	0	0
yeast_20	4	0	0	0	0	0	0
yeast_21	4	0	0	0	0	0	0
yeast_22	4	0	0	0	0	0	0
yeast_23	4	0	0	0	0	0	0
yeast_24	4	0	0	0	0	0	0
yeast_25	4	0	0	0	0	0	0
yeast_3	4	0	0	0	0	0	0
yeast_4	4	0	0	0	0	0	0
yeast_5	4	0	0	0	0	0	0
yeast_6	4	0	0	0	0	0	0
yeast_7	4	0	0	0	0	0	0
yeast_8	4	0	0	0	0	0	0
yeast_9	4	0	0	0	0	0	0
blood_1	7	0	0	0	0	0	0
blood_10	7	0	0	0	0	0	0
blood_11	7	0	0	0	0	0	0
blood_12	7	0	0	0	0	0	0
blood_13	7	0	0	0	0	0	0
blood_14	7	0	0	0	0	0	0
blood_15	7	0	0	0	0	0	0
blood_16	7	0	0	0	0	0	0
blood_17	7	0	0	0	0	0	0
blood_18	7	0	0	0	0	0	0
blood_19	7	0	0	0	0	0	0
blood_2	7	0	0	0	0	0	0
blood_20	7	0	0	0	0	0	0
blood_21	7	0	0	0	0	0	0
blood_22	7	0	0	0	0	0	0
blood_23	7	0	0	0	0	0	0
blood_24	7	0	0	0	0	0	0
blood_25	7	0	0	0	0	0	0
blood_3	7	0	0	0	0	0	0
blood_4	7	0	0	0	0	0	0
blood_5	7	0	0	0	0	0	0
blood_6	7	0	0	0	0	0	0
blood_7	7	0	0	0	0	0	0
blood_8	7	0	0	0	0	0	0
blood_9	7	0	0	0	0	0	0
bone_1	7	1	1	0	0	0	0
bone_10	7	0	0	0	0	0	0
bone_11	7	0	0	0	0	0	0
bone_12	7	0	0	0	0	0	0
bone_13	7	0	0	0	0	0	0
bone_14	7	0	0	0	0	0	0
bone_15	7	0	0	0	0	0	0
bone_16	7	0	0	0	0	0	0
bone_17	7	0	0	0	0	0	0
bone_18	7	0	0	0	0	0	0
bone_19	7	0	0	0	0	0	0
bone_2	7	1	1	0	0	0	0
bone_20	7	0	0	0	0	0	0
bone_21	7	0	0	0	0	0	0
bone_22	7	0	0	0	0	0	0
bone_23	7	0	0	0	0	0	0
bone_24	7	0	0	0	0	0	0
bone_25	7	0	0	0	0	0	0
bone_3	7	2	2	0	0	0	0
bone_4	7	0	0	0	0	0	0
bone_5	7	0	0	0	0	0	0
bone_6	7	0	0	0	0	0	0
bone_7	7	0	0	0	0	0	0
bone_8	7	0	0	0	0	0	0
bone_9	7	0	0	0	0	0	0
chlor_1	7	0	0	0	0	0	0
chlor_10	7	0	0	0	0	0	0
chlor_11	7	0	0	0	0	0	0
chlor_12	7	0	0	0	0	0	0
chlor_13	7	0	0	0	0	0	0
chlor_14	7	0	0	0	0	0	0
chlor_15	7	2	0	0	0	0	0
chlor_16	7	0	0	0	0	0	0
chlor_17	7	0	0	0	0	0	0
chlor_18	7	0	0	0	0	0	0
chlor_19	7	0	0	0	0	0	0
chlor_2	7	0	0	0	0	0	0
chlor_20	7	0	0	0	0	0	0
chlor_21	7	0	0	0	0	0	0
chlor_22	7	0	0	0	0	0	0
chlor_23	7	0	0	0	0	0	0
chlor_24	7	0	0	0	0	0	0
chlor_25	7	0	0	0	0	0	0
chlor_3	7	0	0	0	0	0	0
chlor_4	7	0	0	0	0	0	0
chlor_5	7	0	0	0	0	0	0
chlor_6	7	0	0	0	0	0	0
chlor_7	7	0	0	0	0	0	0
chlor_8	7	0	0	0	0	0	0
chlor_9	7	0	0	0	0	0	0
fungi_1	7	0	0	0	0	0	0
fungi_10	7	0	0	0	0	0	0
fungi_11	7	0	0	0	0	0	0
fungi_12	7	0	0	0	0	0	0
fungi_13	7	0	0	0	0	0	0
fungi_14	7	0	0	0	0	0	0
fungi_15	7	0	0	0	0	0	0
fungi_16	7	0	0	0	0	0	0
fungi_17	7	0	0	0	0	0	0
fungi_18	7	0	0	0	0	0	0
fungi_19	7	0	0	0	0	0	0
fungi_2	7	0	0	0	0	0	0
fungi_20	7	0	0	0	0	0	0
fungi_21	7	0	0	0	0	0	0
fungi_22	7	0	0	0	0	0	0
fungi_23	7	0	0	0	0	0	0
fungi_24	7	0	0	0	0	0	0
fungi_25	7	0	0	0	0	0	0
fungi_3	7	0	0	0	0	0	0
fungi_4	7	0	0	0	0	0	0
fungi_5	7	3	0	0	0	0	0
fungi_6	7	1	0	0	0	0	0
fungi_7	7	0	0	0	0	0	0
fungi_8	7	0	0	0	0	0	0
fungi_9	7	0	0	0	0	0	0
hemp_1	7	1	1	0	0	0	0
hemp_10	7	0	0	0	0	0	0
hemp_11	7	1	1	0	0	0	0
hemp_12	7	0	0	0	0	0	0
hemp_13	7	0	0	0	0	0	0
hemp_14	7	0	0	0	0	0	0
hemp_15	7	1	1	0	0	0	0
hemp_16	7	4	0	0	0	0	0
hemp_17	7	0	0	0	0	0	0
hemp_18	7	0	0	0	0	0	0
hemp_19	7	0	0	0	0	0	0
hemp_2	7	0	0	0	0	0	0
hemp_20	7	0	0	0	0	0	0
hemp_21	7	1	1	0	0	0	0
hemp_22	7	3	0	0	0	0	0
hemp_23	7	3	0	0	0	0	0
hemp_24	7	1	1	0	0	0	0
hemp_25	7	0	0	0	0	0	0
hemp_3	7	0	0	0	0	0	0
hemp_4	7	0	0	0	0	0	0
hemp_5	7	0	0	0	0	0	0
hemp_6	7	0	0	0	0	0	0
hemp_7	7	0	0	0	0	0	0
hemp_8	7	1	1	0	0	0	0
hemp_9	7	0	0	0	0	0	0
lupine_1	7	0	0	0	0	0	0
lupine_10	7	0	0	0	0	0	0
lupine_11	7	0	0	0	0	0	0
lupine_12	7	0	0	0	0	0	0
lupine_13	7	0	0	0	0	0	0
lupine_14	7	0	0	0	0	0	0
lupine_15	7	0	0	0	0	0	0
lupine_16	7	0	0	0	0	0	0
lupine_17	7	0	0	0	0	0	0
lupine_18	7	0	0	0	0	0	0
lupine_19	7	0	0	0	0	0	0
lupine_2	7	0	0	0	0	0	0
lupine_20	7	0	0	0	0	0	0
lupine_21	7	0	0	0	0	0	0
lupine_22	7	0	0	0	0	0	0
lupine_23	7	0	0	0	0	0	0
lupine_24	7	0	0	0	0	0	0
lupine_25	7	0	0	0	0	0	0
lupine_3	7	0	0	0	0	0	0
lupine_4	7	0	0	0	0	0	0
lupine_5	7	0	0	0	0	0	0
lupine_6	7	0	0	0	0	0	0
lupine_7	7	0	0	0	0	0	0
lupine_8	7	0	0	0	0	0	0
lupine_9	7	0	0	0	0	0	0
pollen_1	7	0	0	0	0	0	0
pollen_10	7	0	0	0	0	0	0
pollen_11	7	0	0	0	0	0	0
pollen_12	7	0	0	0	0	0	0
pollen_13	7	0	0	0	0	0	0
pollen_14	7	0	0	0	0	0	0
pollen_15	7	0	0	0	0	0	0
pollen_16	7	16	0	0	0	0	0
pollen_17	7	0	0	0	0	0	0
pollen_18	7	3	0	0	0	0	0
pollen_19	7	0	0	0	0	0	0
pollen_2	7	0	0	0	0	0	0
pollen_20	7	0	0	0	0	0	0
pollen_21	7	0	0	0	0	0	0
pollen_22	7	0	0	0	0	0	0
pollen_23	7	0	0	0	0	0	0
pollen_24	7	0	0	0	0	0	0
pollen_25	7	0	0	0	0	0	0
pollen_3	7	0	0	0	0	0	0
pollen_4	7	0	0	0	0	0	0
pollen_5	7	0	0	0	0	0	0
pollen_6	7	0	0	0	0	0	0
pollen_7	7	0	0	0	0	0	0
pollen_8	7	0	0	0	0	0	0
pollen_9	7	0	0	0	0	0	0
spiru_1	7	0	0	0	0	0	0
spiru_10	7	0	0	0	0	0	0
spiru_11	7	0	0	0	0	0	0
spiru_12	7	0	0	0	0	0	0
spiru_13	7	0	0	0	0	0	0
spiru_14	7	0	0	0	0	0	0
spiru_15	7	0	0	0	0	0	0
spiru_16	7	0	0	0	0	0	0
spiru_17	7	0	0	0	0	0	0
spiru_18	7	0	0	0	0	0	0
spiru_19	7	0	0	0	0	0	0
spiru_2	7	0	0	0	0	0	0
spiru_20	7	0	0	0	0	0	0
spiru_21	7	0	0	0	0	0	0
spiru_22	7	0	0	0	0	0	0
spiru_23	7	0	0	0	0	0	0
spiru_24	7	0	0	0	0	0	0
spiru_25	7	0	0	0	0	0	0
spiru_3	7	0	0	0	0	0	0
spiru_4	7	0	0	0	0	0	0
spiru_5	7	0	0	0	0	0	0
spiru_6	7	0	0	0	0	0	0
spiru_7	7	0	0	0	0	0	0
spiru_8	7	0	0	0	0	0	0
spiru_9	7	0	0	0	0	0	0
wheat_1	7	0	0	0	0	0	0
wheat_10	7	0	0	0	0	0	0
wheat_11	7	0	0	0	0	0	0
wheat_12	7	0	0	0	0	0	0
wheat_13	7	0	0	0	0	0	0
wheat_14	7	0	0	0	0	0	0
wheat_15	7	0	0	0	0	0	0
wheat_16	7	0	0	0	0	0	0
wheat_17	7	0	0	0	0	0	0
wheat_18	7	0	0	0	0	0	0
wheat_19	7	0	0	0	0	0	0
wheat_2	7	0	0	0	0	0	0
wheat_20	7	0	0	0	0	0	0
wheat_21	7	0	0	0	0	0	0
wheat_22	7	0	0	0	0	0	0
wheat_23	7	0	0	0	0	0	0
wheat_24	7	0	0	0	0	0	0
wheat_25	7	0	0	0	0	0	0
wheat_3	7	0	0	0	0	0	0
wheat_4	7	0	0	0	0	0	0
wheat_5	7	0	0	0	0	0	0
wheat_6	7	28	0	0	0	0	0
wheat_7	7	20	0	0	0	0	0
wheat_8	7	0	0	0	0	0	0
wheat_9	7	0	0	0	0	0	0
yeast_1	7	0	0	0	0	0	0
yeast_10	7	0	0	0	0	0	0
yeast_11	7	0	0	0	0	0	0
yeast_12	7	0	0	0	0	0	0
yeast_13	7	0	0	0	0	0	0
yeast_14	7	0	0	0	0	0	0
yeast_15	7	0	0	0	0	0	0
yeast_16	7	6	0	0	0	0	0
yeast_17	7	0	0	0	0	0	0
yeast_18	7	0	0	0	0	0	0
yeast_19	7	0	0	0	0	0	0
yeast_2	7	0	0	0	0	0	0
yeast_20	7	0	0	0	0	0	0
yeast_21	7	0	0	0	0	0	0
yeast_22	7	0	0	0	0	0	0
yeast_23	7	0	0	0	0	0	0
yeast_24	7	0	0	0	0	0	0
yeast_25	7	0	0	0	0	0	0
yeast_3	7	0	0	0	0	0	0
yeast_4	7	0	0	0	0	0	0
yeast_5	7	0	0	0	0	0	0
yeast_6	7	0	0	0	0	0	0
yeast_7	7	0	0	0	0	0	0
yeast_8	7	0	0	0	0	0	0
yeast_9	7	0	0	0	0	0	0
blood_1	8	0	0	0	0	0	0
blood_10	8	0	0	0	0	0	0
blood_11	8	0	0	0	0	0	0
blood_12	8	0	0	0	0	0	0
blood_13	8	0	0	0	0	0	0
blood_14	8	0	0	0	0	0	0
blood_15	8	0	0	0	0	0	0
blood_16	8	0	0	0	0	0	0
blood_17	8	0	0	0	0	0	0
blood_18	8	0	0	0	0	0	0
blood_19	8	0	0	0	0	0	0
blood_2	8	0	0	0	0	0	0
blood_20	8	0	0	0	0	0	0
blood_21	8	0	0	0	0	0	0
blood_22	8	0	0	0	0	0	0
blood_23	8	0	0	0	0	0	0
blood_24	8	0	0	0	0	0	0
blood_25	8	0	0	0	0	0	0
blood_3	8	0	0	0	0	0	0
blood_4	8	0	0	0	0	0	0
blood_5	8	0	0	0	0	0	0
blood_6	8	0	0	0	0	0	0
blood_7	8	0	0	0	0	0	0
blood_8	8	0	0	0	0	0	0
blood_9	8	0	0	0	0	0	0
bone_1	8	1	1	0	0	0	0
bone_10	8	0	0	0	0	0	0
bone_11	8	0	0	0	0	0	0
bone_12	8	0	0	0	0	0	0
bone_13	8	0	0	0	0	0	0
bone_14	8	0	0	0	0	0	0
bone_15	8	0	0	0	0	0	0
bone_16	8	0	0	0	0	0	0
bone_17	8	0	0	0	0	0	0
bone_18	8	0	0	0	0	0	0
bone_19	8	7	0	0	0	0	0
bone_2	8	1	1	0	0	0	0
bone_20	8	0	0	0	0	0	0
bone_21	8	0	0	0	0	0	0
bone_22	8	0	0	0	0	0	0
bone_23	8	0	0	0	0	0	0
bone_24	8	0	0	0	0	0	0
bone_25	8	0	0	0	0	0	0
bone_3	8	0	0	0	0	0	0
bone_4	8	0	0	0	0	0	0
bone_5	8	0	0	0	0	0	0
bone_6	8	0	0	0	0	0	0
bone_7	8	0	0	0	0	0	0
bone_8	8	0	0	0	0	0	0
bone_9	8	0	0	0	0	0	0
chlor_1	8	0	0	0	0	0	0
chlor_10	8	0	0	0	0	0	0
chlor_11	8	0	0	0	0	0	0
chlor_12	8	0	0	0	0	0	0
chlor_13	8	0	0	0	0	0	0
chlor_14	8	0	0	0	0	0	0
chlor_15	8	0	0	0	0	0	0
chlor_16	8	0	0	0	0	0	0
chlor_17	8	0	0	0	0	0	0
chlor_18	8	0	0	0	0	0	0
chlor_19	8	0	0	0	0	0	0
chlor_2	8	0	0	0	0	0	0
chlor_20	8	0	0	0	0	0	0
chlor_21	8	0	0	0	0	0	0
chlor_22	8	0	0	0	0	0	0
chlor_23	8	0	0	0	0	0	0
chlor_24	8	0	0	0	0	0	0
chlor_25	8	0	0	0	0	0	0
chlor_3	8	4	0	0	0	0	0
chlor_4	8	0	0	0	0	0	0
chlor_5	8	0	0	0	0	0	0
chlor_6	8	0	0	0	0	0	0
chlor_7	8	0	0	0	0	0	0
chlor_8	8	0	0	0	0	0	0
chlor_9	8	0	0	0	0	0	0
fungi_1	8	0	0	0	0	0	0
fungi_10	8	0	0	0	0	0	0
fungi_11	8	0	0	0	0	0	0
fungi_12	8	0	0	0	0	0	0
fungi_13	8	0	0	0	0	0	0
fungi_14	8	1	1	0	0	0	0
fungi_15	8	0	0	0	0	0	0
fungi_16	8	0	0	0	0	0	0
fungi_17	8	0	0	0	0	0	0
fungi_18	8	0	0	0	0	0	0
fungi_19	8	0	0	0	0	0	0
fungi_2	8	0	0	0	0	0	0
fungi_20	8	0	0	0	0	0	0
fungi_21	8	0	0	0	0	0	0
fungi_22	8	0	0	0	0	0	0
fungi_23	8	0	0	0	0	0	0
fungi_24	8	0	0	0	0	0	0
fungi_25	8	0	0	0	0	0	0
fungi_3	8	12	0	0	0	0	0
fungi_4	8	0	0	0	0	0	0
fungi_5	8	2	0	0	0	0	0
fungi_6	8	2	0	0	0	0	0
fungi_7	8	0	0	0	0	0	0
fungi_8	8	0	0	0	0	0	0
fungi_9	8	0	0	0	0	0	0
hemp_1	8	2	2	0	0	0	0
hemp_10	8	0	0	0	0	0	0
hemp_11	8	1	1	0	0	0	0
hemp_12	8	0	0	0	0	0	0
hemp_13	8	0	0	0	0	0	0
hemp_14	8	0	0	0	0	0	0
hemp_15	8	0	0	0	0	0	0
hemp_16	8	9	0	0	0	0	0
hemp_17	8	0	0	0	0	0	0
hemp_18	8	0	0	0	0	0	0
hemp_19	8	0	0	0	0	0	0
hemp_2	8	0	0	0	0	0	0
hemp_20	8	0	0	0	0	0	0
hemp_21	8	1	1	0	0	0	0
hemp_22	8	0	0	0	0	0	0
hemp_23	8	5	0	0	0	0	0
hemp_24	8	0	0	0	0	0	0
hemp_25	8	0	0	0	0	0	0
hemp_3	8	0	0	0	0	0	0
hemp_4	8	0	0	0	0	0	0
hemp_5	8	0	0	0	0	0	0
hemp_6	8	1	1	1	0	0	0
hemp_7	8	0	0	0	0	0	0
hemp_8	8	0	0	2	0	0	0
hemp_9	8	0	0	0	0	0	0
lupine_1	8	0	0	0	0	0	0
lupine_10	8	0	0	0	0	0	0
lupine_11	8	0	0	0	0	0	0
lupine_12	8	0	0	0	0	0	0
lupine_13	8	0	0	0	0	0	0
lupine_14	8	0	0	0	0	0	0
lupine_15	8	0	0	0	0	0	0
lupine_16	8	0	0	0	0	0	0
lupine_17	8	0	0	0	0	0	0
lupine_18	8	0	0	0	0	0	0
lupine_19	8	0	0	0	0	0	0
lupine_2	8	0	0	0	0	0	0
lupine_20	8	0	0	0	0	0	0
lupine_21	8	0	0	0	0	0	0
lupine_22	8	0	0	0	0	0	0
lupine_23	8	0	0	0	0	0	0
lupine_24	8	0	0	0	0	0	0
lupine_25	8	0	0	0	0	0	0
lupine_3	8	8	0	0	0	0	0
lupine_4	8	0	0	0	0	0	0
lupine_5	8	0	0	0	0	0	0
lupine_6	8	0	0	0	0	0	0
lupine_7	8	0	0	0	0	0	0
lupine_8	8	0	0	0	0	0	0
lupine_9	8	0	0	0	0	0	0
pollen_1	8	0	0	0	0	0	0
pollen_10	8	17	17	0	0	0	0
pollen_11	8	3	3	0	0	0	0
pollen_12	8	5	3	0	0	0	0
pollen_13	8	3	0	0	0	0	0
pollen_14	8	0	0	0	0	0	0
pollen_15	8	0	0	0	0	0	0
pollen_16	8	16	0	0	0	0	0
pollen_17	8	3	1	0	0	0	0
pollen_18	8	0	0	0	0	0	0
pollen_19	8	0	0	0	0	0	0
pollen_2	8	3	3	0	0	0	0
pollen_20	8	0	0	0	0	0	0
pollen_21	8	9	0	0	0	0	0
pollen_22	8	0	0	0	0	0	0
pollen_23	8	0	0	0	0	0	0
pollen_24	8	6	1	0	0	0	0
pollen_25	8	0	0	0	0	0	0
pollen_3	8	0	0	0	0	0	0
pollen_4	8	0	0	0	0	0	0
pollen_5	8	0	0	0	0	0	0
pollen_6	8	0	0	0	0	0	0
pollen_7	8	6	0	0	0	0	0
pollen_8	8	0	0	0	0	0	0
pollen_9	8	1	1	0	0	0	0
spiru_1	8	0	0	0	0	0	0
spiru_10	8	0	0	0	0	0	0
spiru_11	8	0	0	0	0	0	0
spiru_12	8	0	0	0	0	0	0
spiru_13	8	0	0	0	0	0	0
spiru_14	8	0	0	0	0	0	0
spiru_15	8	0	0	0	0	0	0
spiru_16	8	0	0	0	0	0	0
spiru_17	8	0	0	0	0	0	0
spiru_18	8	0	0	0	0	0	0
spiru_19	8	0	0	0	0	0	0
spiru_2	8	0	0	0	0	0	0
spiru_20	8	0	0	0	0	0	0
spiru_21	8	0	0	0	0	0	0
spiru_22	8	0	0	0	0	0	0
spiru_23	8	0	0	0	0	0	0
spiru_24	8	0	0	0	0	0	0
spiru_25	8	0	0	0	0	0	0
spiru_3	8	0	0	0	0	0	0
spiru_4	8	0	0	0	0	0	0
spiru_5	8	0	0	0	0	0	0
spiru_6	8	0	0	0	0	0	0
spiru_7	8	0	0	0	0	0	0
spiru_8	8	0	0	0	0	0	0
spiru_9	8	0	0	0	0	0	0
wheat_1	8	1	0	0	0	0	0
wheat_10	8	0	0	0	0	0	0
wheat_11	8	1	1	0	0	0	0
wheat_12	8	0	0	2	0	0	0
wheat_13	8	0	0	0	0	0	0
wheat_14	8	0	0	0	0	0	0
wheat_15	8	0	0	0	0	0	0
wheat_16	8	0	0	0	0	0	0
wheat_17	8	0	0	0	0	0	0
wheat_18	8	0	0	0	0	0	0
wheat_19	8	0	0	0	0	0	0
wheat_2	8	0	0	0	0	0	0
wheat_20	8	0	0	0	0	0	0
wheat_21	8	0	0	0	0	0	0
wheat_22	8	0	0	0	0	0	0
wheat_23	8	0	0	0	0	0	0
wheat_24	8	0	0	0	0	0	0
wheat_25	8	0	0	0	0	0	0
wheat_3	8	0	0	0	0	0	0
wheat_4	8	0	0	0	0	0	0
wheat_5	8	0	0	0	0	0	0
wheat_6	8	28	0	0	0	0	0
wheat_7	8	16	0	0	0	0	0
wheat_8	8	0	0	0	0	0	0
wheat_9	8	6	0	0	0	0	0
yeast_1	8	0	0	0	0	0	0
yeast_10	8	0	0	0	0	0	0
yeast_11	8	0	0	0	0	0	0
yeast_12	8	0	0	0	0	0	0
yeast_13	8	0	0	0	0	0	0
yeast_14	8	0	0	0	0	0	0
yeast_15	8	0	0	0	0	0	0
yeast_16	8	0	0	0	0	0	0
yeast_17	8	0	0	0	0	0	0
yeast_18	8	0	0	0	0	0	0
yeast_19	8	0	0	0	0	0	0
yeast_2	8	0	0	0	0	0	0
yeast_20	8	0	0	0	0	0	0
yeast_21	8	0	0	0	0	0	0
yeast_22	8	0	0	0	0	0	0
yeast_23	8	0	0	0	0	0	0
yeast_24	8	0	0	0	0	0	0
yeast_25	8	0	0	0	0	0	0
yeast_3	8	0	0	0	0	0	0
yeast_4	8	0	0	0	0	0	0
yeast_5	8	0	0	0	0	0	0
yeast_6	8	0	0	0	0	0	0
yeast_7	8	0	0	0	0	0	0
yeast_8	8	0	0	0	0	0	0
yeast_9	8	2	0	0	0	0	0
blood_1	9	0	0	0	0	0	0
blood_10	9	0	0	0	0	0	0
blood_11	9	0	0	0	0	0	0
blood_12	9	0	0	0	0	0	0
blood_13	9	0	0	0	0	0	0
blood_14	9	0	0	0	0	0	0
blood_15	9	0	0	0	0	0	0
blood_16	9	0	0	0	0	0	0
blood_17	9	0	0	0	0	0	0
blood_18	9	0	0	0	0	0	0
blood_19	9	0	0	0	0	0	0
blood_2	9	0	0	0	0	0	0
blood_20	9	0	0	0	0	0	0
blood_21	9	0	0	0	0	0	0
blood_22	9	0	0	0	0	0	0
blood_23	9	0	0	0	0	0	0
blood_24	9	0	0	0	0	0	0
blood_25	9	0	0	0	0	0	0
blood_3	9	0	0	0	0	0	0
blood_4	9	0	0	0	0	0	0
blood_5	9	0	0	0	0	0	0
blood_6	9	0	0	0	0	0	0
blood_7	9	0	0	0	0	0	0
blood_8	9	0	0	0	0	0	0
blood_9	9	0	0	0	0	0	0
bone_1	9	3	3	0	0	0	0
bone_10	9	1	1	0	0	0	0
bone_11	9	0	0	0	0	0	0
bone_12	9	0	0	0	0	0	0
bone_13	9	0	0	0	0	0	0
bone_14	9	0	0	0	0	0	0
bone_15	9	1	1	0	0	0	0
bone_16	9	0	0	0	0	0	0
bone_17	9	0	0	0	0	0	0
bone_18	9	0	0	0	0	0	0
bone_19	9	0	0	0	0	0	0
bone_2	9	0	0	0	0	0	0
bone_20	9	0	0	0	0	0	0
bone_21	9	0	0	0	0	0	0
bone_22	9	0	0	0	0	0	0
bone_23	9	0	0	0	0	0	0
bone_24	9	0	0	0	0	0	0
bone_25	9	0	0	0	0	0	0
bone_3	9	1	1	0	0	0	0
bone_4	9	0	0	0	0	0	0
bone_5	9	0	0	0	0	0	0
bone_6	9	0	0	0	0	0	0
bone_7	9	0	0	0	0	0	0
bone_8	9	0	0	0	0	0	0
bone_9	9	0	0	0	0	0	0
chlor_1	9	0	0	0	0	0	0
chlor_10	9	0	0	0	0	0	0
chlor_11	9	0	0	0	0	0	0
chlor_12	9	0	0	0	0	0	0
chlor_13	9	0	0	0	0	0	0
chlor_14	9	0	0	0	0	0	0
chlor_15	9	0	0	0	0	0	0
chlor_16	9	0	0	0	0	0	0
chlor_17	9	0	0	0	0	0	0
chlor_18	9	0	0	0	0	0	0
chlor_19	9	0	0	0	0	0	0
chlor_2	9	2	2	0	0	0	0
chlor_20	9	0	0	0	0	0	0
chlor_21	9	0	0	0	0	0	0
chlor_22	9	0	0	0	0	0	0
chlor_23	9	0	0	0	0	0	0
chlor_24	9	2	2	0	0	0	0
chlor_25	9	0	0	0	0	0	0
chlor_3	9	0	0	0	0	0	0
chlor_4	9	0	0	0	0	0	0
chlor_5	9	0	0	0	0	0	0
chlor_6	9	0	0	0	0	0	0
chlor_7	9	0	0	0	0	0	0
chlor_8	9	0	0	0	0	0	0
chlor_9	9	0	0	0	0	0	0
fungi_1	9	0	0	0	0	0	0
fungi_10	9	0	0	0	0	0	0
fungi_11	9	0	0	0	0	0	0
fungi_12	9	0	0	0	0	0	0
fungi_13	9	0	0	0	0	0	0
fungi_14	9	2	2	0	0	0	0
fungi_15	9	0	0	0	0	0	0
fungi_16	9	0	0	0	0	0	0
fungi_17	9	0	0	0	0	0	0
fungi_18	9	0	0	0	0	0	0
fungi_19	9	0	0	0	0	0	0
fungi_2	9	0	0	0	0	0	0
fungi_20	9	0	0	0	0	0	0
fungi_21	9	0	0	0	0	0	0
fungi_22	9	0	0	0	0	0	0
fungi_23	9	0	0	0	0	0	0
fungi_24	9	0	0	0	0	0	0
fungi_25	9	0	0	0	0	0	0
fungi_3	9	11	0	0	0	0	0
fungi_4	9	0	0	0	0	0	0
fungi_5	9	2	0	0	0	0	0
fungi_6	9	1	0	0	0	0	0
fungi_7	9	0	0	0	0	0	0
fungi_8	9	0	0	0	0	0	0
fungi_9	9	0	0	0	0	0	0
hemp_1	9	2	2	0	0	0	0
hemp_10	9	0	0	0	0	0	0
hemp_11	9	0	0	0	0	0	0
hemp_12	9	0	0	0	0	0	0
hemp_13	9	0	0	0	0	0	0
hemp_14	9	0	0	0	0	0	0
hemp_15	9	0	0	0	0	0	0
hemp_16	9	10	0	0	0	0	0
hemp_17	9	0	0	0	0	0	0
hemp_18	9	0	0	0	0	0	0
hemp_19	9	0	0	0	0	0	0
hemp_2	9	0	0	0	0	0	0
hemp_20	9	0	0	0	0	0	0
hemp_21	9	1	0	0	0	0	0
hemp_22	9	3	0	0	0	0	0
hemp_23	9	3	0	0	0	0	0
hemp_24	9	2	0	0	0	0	0
hemp_25	9	0	0	0	0	0	0
hemp_3	9	0	0	0	0	0	0
hemp_4	9	10	0	0	0	0	0
hemp_5	9	4	0	0	0	0	0
hemp_6	9	2	0	0	0	0	0
hemp_7	9	0	0	0	0	0	0
hemp_8	9	3	3	0	0	0	0
hemp_9	9	1	1	0	0	0	0
lupine_1	9	0	0	0	0	0	0
lupine_10	9	0	0	0	0	0	0
lupine_11	9	0	0	0	0	0	0
lupine_12	9	0	0	0	0	0	0
lupine_13	9	0	0	0	0	0	0
lupine_14	9	0	0	0	0	0	0
lupine_15	9	0	0	0	0	0	0
lupine_16	9	0	0	0	0	0	0
lupine_17	9	4	0	0	0	0	0
lupine_18	9	0	0	0	0	0	0
lupine_19	9	0	0	0	0	0	0
lupine_2	9	0	0	0	0	0	0
lupine_20	9	0	0	0	0	0	0
lupine_21	9	0	0	0	0	0	0
lupine_22	9	0	0	0	0	0	0
lupine_23	9	0	0	0	0	0	0
lupine_24	9	0	0	0	0	0	0
lupine_25	9	0	0	0	0	0	0
lupine_3	9	0	0	0	0	0	0
lupine_4	9	0	0	0	0	0	0
lupine_5	9	0	0	0	0	0	0
lupine_6	9	0	0	0	0	0	0
lupine_7	9	0	0	0	0	0	0
lupine_8	9	0	0	0	0	0	0
lupine_9	9	0	0	0	0	0	0
pollen_1	9	2	2	0	0	0	0
pollen_10	9	15	0	0	0	0	0
pollen_11	9	6	6	0	0	0	0
pollen_12	9	5	5	0	0	0	0
pollen_13	9	0	0	0	0	0	0
pollen_14	9	0	0	0	0	0	0
pollen_15	9	0	0	0	0	0	0
pollen_16	9	16	4	0	0	0	0
pollen_17	9	0	0	0	0	0	0
pollen_18	9	3	0	0	0	0	0
pollen_19	9	0	0	0	0	0	0
pollen_2	9	3	3	0	0	0	0
pollen_20	9	0	0	0	0	0	0
pollen_21	9	14	0	0	0	0	0
pollen_22	9	0	0	0	0	0	0
pollen_23	9	0	0	0	0	0	0
pollen_24	9	6	1	0	0	0	0
pollen_25	9	0	0	0	0	0	0
pollen_3	9	1	0	0	0	0	0
pollen_4	9	0	0	0	0	0	0
pollen_5	9	8	8	0	0	0	0
pollen_6	9	0	0	0	0	0	0
pollen_7	9	6	1	0	0	0	0
pollen_8	9	1	1	0	0	0	0
pollen_9	9	0	0	0	0	0	0
spiru_1	9	0	0	0	0	0	0
spiru_10	9	0	0	0	0	0	0
spiru_11	9	0	0	0	0	0	0
spiru_12	9	0	0	0	0	0	0
spiru_13	9	0	0	0	0	0	0
spiru_14	9	0	0	0	0	0	0
spiru_15	9	0	0	0	0	0	0
spiru_16	9	0	0	0	0	0	0
spiru_17	9	0	0	0	0	0	0
spiru_18	9	0	0	0	0	0	0
spiru_19	9	0	0	0	0	0	0
spiru_2	9	0	0	0	0	0	0
spiru_20	9	0	0	0	0	0	0
spiru_21	9	0	0	0	0	0	0
spiru_22	9	0	0	0	0	0	0
spiru_23	9	0	0	0	0	0	0
spiru_24	9	0	0	0	0	0	0
spiru_25	9	0	0	0	0	0	0
spiru_3	9	0	0	0	0	0	0
spiru_4	9	0	0	0	0	0	0
spiru_5	9	0	0	0	0	0	0
spiru_6	9	0	0	0	0	0	0
spiru_7	9	0	0	0	0	0	0
spiru_8	9	0	0	0	0	0	0
spiru_9	9	0	0	0	0	0	0
wheat_1	9	1	0	0	0	0	0
wheat_10	9	0	0	0	0	0	0
wheat_11	9	0	0	0	0	0	0
wheat_12	9	3	3	0	0	0	0
wheat_13	9	0	0	0	0	0	0
wheat_14	9	0	0	0	0	0	0
wheat_15	9	0	0	0	0	0	0
wheat_16	9	0	0	0	0	0	0
wheat_17	9	14	14	0	0	0	0
wheat_18	9	1	1	0	0	0	0
wheat_19	9	0	0	0	0	0	0
wheat_2	9	0	0	0	0	0	0
wheat_20	9	0	0	0	0	0	0
wheat_21	9	0	0	0	0	0	0
wheat_22	9	0	0	0	0	0	0
wheat_23	9	0	0	0	0	0	0
wheat_24	9	0	0	0	0	0	0
wheat_25	9	18	0	0	0	0	0
wheat_3	9	9	0	0	0	0	0
wheat_4	9	0	0	0	0	0	0
wheat_5	9	0	0	0	0	0	0
wheat_6	9	43	0	0	0	0	0
wheat_7	9	22	0	0	0	0	0
wheat_8	9	0	0	0	0	0	0
wheat_9	9	18	0	0	0	0	0
yeast_1	9	0	0	0	0	0	0
yeast_10	9	0	0	0	0	0	0
yeast_11	9	0	0	0	0	0	0
yeast_12	9	0	0	0	0	0	0
yeast_13	9	13	13	0	0	0	0
yeast_14	9	1	0	0	0	0	0
yeast_15	9	8	0	0	0	0	0
yeast_16	9	5	0	0	0	0	0
yeast_17	9	3	0	0	0	0	0
yeast_18	9	5	0	0	0	0	0
yeast_19	9	5	5	0	0	0	0
yeast_2	9	13	9	0	0	0	0
yeast_20	9	0	0	0	0	0	0
yeast_21	9	13	0	0	0	0	0
yeast_22	9	0	0	0	0	0	0
yeast_23	9	18	7	0	0	0	0
yeast_24	9	8	0	0	0	0	0
yeast_25	9	7	0	0	0	0	0
yeast_3	9	0	0	0	0	0	0
yeast_4	9	5	0	0	0	0	0
yeast_5	9	0	0	0	0	0	0
yeast_6	9	3	1	0	0	0	0
yeast_7	9	16	0	0	0	0	0
yeast_8	9	0	0	0	0	0	0
yeast_9	9	0	0	0	0	0	0
blood_1	10	0	0	0	0	0	0
blood_10	10	0	0	0	0	0	0
blood_11	10	0	0	1	0	0	0
blood_12	10	0	0	0	0	0	0
blood_13	10	1	1	0	0	0	0
blood_14	10	0	0	0	0	0	0
blood_15	10	0	0	0	0	0	0
blood_16	10	1	1	0	0	0	0
blood_17	10	0	0	0	0	0	0
blood_18	10	0	0	0	0	0	0
blood_19	10	0	0	0	0	0	0
blood_2	10	0	0	0	0	0	0
blood_20	10	0	0	0	0	0	0
blood_21	10	1	1	0	0	0	0
blood_22	10	0	0	0	0	0	0
blood_23	10	0	0	0	0	0	0
blood_24	10	0	0	0	0	0	0
blood_25	10	0	0	0	0	0	0
blood_3	10	0	0	0	0	0	0
blood_4	10	0	0	0	0	0	0
blood_5	10	0	0	0	0	0	0
blood_6	10	0	0	0	0	0	0
blood_7	10	0	0	0	0	0	0
blood_8	10	0	0	0	0	0	0
blood_9	10	0	0	0	0	0	0
bone_1	10	2	2	0	0	0	0
bone_10	10	2	2	0	0	0	0
bone_11	10	0	0	0	0	0	0
bone_12	10	0	0	0	0	0	0
bone_13	10	0	0	0	0	0	0
bone_14	10	0	0	0	0	0	0
bone_15	10	0	0	0	0	0	0
bone_16	10	0	0	0	0	0	0
bone_17	10	0	0	0	0	0	0
bone_18	10	0	0	0	0	0	0
bone_19	10	0	0	0	0	0	0
bone_2	10	0	0	0	0	0	0
bone_20	10	0	0	0	0	0	0
bone_21	10	0	0	0	0	0	0
bone_22	10	0	0	0	0	0	0
bone_23	10	0	0	0	0	0	0
bone_24	10	0	0	0	0	0	0
bone_25	10	0	0	0	0	0	0
bone_3	10	1	1	0	0	0	0
bone_4	10	0	0	0	0	0	0
bone_5	10	0	0	0	0	0	0
bone_6	10	0	0	0	0	0	0
bone_7	10	0	0	0	0	0	0
bone_8	10	0	0	0	0	0	0
bone_9	10	0	0	0	0	0	0
chlor_1	10	0	0	0	0	0	0
chlor_10	10	0	0	0	0	0	0
chlor_11	10	0	0	0	0	0	0
chlor_12	10	1	1	0	0	0	0
chlor_13	10	0	0	0	0	0	0
chlor_14	10	0	0	0	0	0	0
chlor_15	10	0	0	0	0	0	0
chlor_16	10	0	0	0	0	0	0
chlor_17	10	4	4	0	0	0	0
chlor_18	10	0	0	0	0	0	0
chlor_19	10	8	0	0	0	0	0
chlor_2	10	4	4	0	0	0	0
chlor_20	10	0	0	0	0	0	0
chlor_21	10	0	0	0	0	0	0
chlor_22	10	0	0	0	0	0	0
chlor_23	10	0	0	0	0	0	0
chlor_24	10	2	2	0	0	0	0
chlor_25	10	0	0	0	0	0	0
chlor_3	10	0	0	0	0	0	0
chlor_4	10	0	0	0	0	0	0
chlor_5	10	7	0	0	0	0	0
chlor_6	10	0	0	0	0	0	0
chlor_7	10	0	0	0	0	0	0
chlor_8	10	0	0	0	0	0	0
chlor_9	10	0	0	0	0	0	0
fungi_1	10	0	0	0	0	0	0
fungi_10	10	0	0	0	0	0	0
fungi_11	10	0	0	0	0	0	0
fungi_12	10	0	0	0	0	0	0
fungi_13	10	0	0	0	0	0	0
fungi_14	10	0	0	1	0	0	0
fungi_15	10	0	0	0	0	0	0
fungi_16	10	0	0	0	0	0	0
fungi_17	10	0	0	0	0	0	0
fungi_18	10	0	0	0	0	0	0
fungi_19	10	0	0	0	0	0	0
fungi_2	10	0	0	0	0	0	0
fungi_20	10	0	0	0	0	0	0
fungi_21	10	0	0	0	0	0	0
fungi_22	10	9	0	0	0	0	0
fungi_23	10	0	0	0	0	0	0
fungi_24	10	0	0	0	0	0	0
fungi_25	10	0	0	0	0	0	0
fungi_3	10	13	0	0	0	0	0
fungi_4	10	0	0	0	0	0	0
fungi_5	10	0	0	0	0	0	0
fungi_6	10	0	0	0	0	0	0
fungi_7	10	0	0	0	0	0	0
fungi_8	10	0	0	0	0	0	0
fungi_9	10	0	0	0	0	0	0
hemp_1	10	4	4	2	0	0	0
hemp_10	10	3	3	0	0	0	0
hemp_11	10	0	0	0	0	0	0
hemp_12	10	0	0	0	0	0	0
hemp_13	10	1	1	0	0	0	0
hemp_14	10	0	0	0	0	0	0
hemp_15	10	0	0	0	0	0	0
hemp_16	10	8	8	0	0	0	0
hemp_17	10	0	0	0	0	0	0
hemp_18	10	0	0	0	0	0	0
hemp_19	10	0	0	0	0	0	0
hemp_2	10	5	0	0	0	0	0
hemp_20	10	0	0	0	0	0	0
hemp_21	10	0	0	0	0	0	0
hemp_22	10	5	5	0	0	0	0
hemp_23	10	3	0	0	0	0	0
hemp_24	10	2	2	0	0	0	0
hemp_25	10	0	0	0	0	0	0
hemp_3	10	0	0	0	0	0	0
hemp_4	10	11	0	0	0	0	0
hemp_5	10	0	0	0	0	0	0
hemp_6	10	0	0	2	0	0	0
hemp_7	10	0	0	0	0	0	0
hemp_8	10	1	1	3	0	0	0
hemp_9	10	1	1	0	0	0	0
lupine_1	10	0	0	0	0	0	0
lupine_10	10	0	0	0	0	0	0
lupine_11	10	0	0	0	0	0	0
lupine_12	10	11	0	0	0	0	0
lupine_13	10	0	0	0	0	0	0
lupine_14	10	0	0	0	0	0	0
lupine_15	10	7	0	0	0	0	0
lupine_16	10	0	0	0	0	0	0
lupine_17	10	0	0	0	0	0	0
lupine_18	10	0	0	0	0	0	0
lupine_19	10	0	0	0	0	0	0
lupine_2	10	0	0	0	0	0	0
lupine_20	10	0	0	0	0	0	0
lupine_21	10	0	0	0	0	0	0
lupine_22	10	0	0	0	0	0	0
lupine_23	10	2	0	0	0	0	0
lupine_24	10	0	0	0	0	0	0
lupine_25	10	0	0	0	0	0	0
lupine_3	10	7	0	0	0	0	0
lupine_4	10	0	0	0	0	0	0
lupine_5	10	0	0	0	0	0	0
lupine_6	10	0	0	0	0	0	0
lupine_7	10	0	0	0	0	0	0
lupine_8	10	0	0	0	0	0	0
lupine_9	10	0	0	0	0	0	0
pollen_1	10	4	4	0	0	0	0
pollen_10	10	12	12	0	0	0	0
pollen_11	10	0	0	0	0	0	0
pollen_12	10	6	6	0	0	0	0
pollen_13	10	0	0	0	0	0	0
pollen_14	10	1	1	0	0	0	0
pollen_15	10	1	1	0	0	0	0
pollen_16	10	0	0	0	0	0	0
pollen_17	10	3	3	0	0	0	0
pollen_18	10	0	0	0	0	0	0
pollen_19	10	0	0	0	0	0	0
pollen_2	10	0	0	0	0	0	0
pollen_20	10	0	0	0	0	0	0
pollen_21	10	10	10	0	0	0	0
pollen_22	10	0	0	0	0	0	0
pollen_23	10	0	0	0	0	0	0
pollen_24	10	6	1	0	0	0	0
pollen_25	10	0	0	0	0	0	0
pollen_3	10	0	0	0	0	0	0
pollen_4	10	0	0	0	0	0	0
pollen_5	10	6	0	0	0	0	0
pollen_6	10	0	0	0	0	0	0
pollen_7	10	0	0	0	0	0	0
pollen_8	10	0	0	0	0	0	0
pollen_9	10	0	0	0	0	0	0
spiru_1	10	0	0	0	0	0	0
spiru_10	10	0	0	0	0	0	0
spiru_11	10	0	0	0	0	0	0
spiru_12	10	0	0	0	0	0	0
spiru_13	10	0	0	0	0	0	0
spiru_14	10	0	0	0	0	0	0
spiru_15	10	0	0	0	0	0	0
spiru_16	10	0	0	0	0	0	0
spiru_17	10	0	0	0	0	0	0
spiru_18	10	0	0	0	0	0	0
spiru_19	10	0	0	0	0	0	0
spiru_2	10	0	0	0	0	0	0
spiru_20	10	0	0	0	0	0	0
spiru_21	10	0	0	0	0	0	0
spiru_22	10	0	0	0	0	0	0
spiru_23	10	0	0	0	0	0	0
spiru_24	10	0	0	0	0	0	0
spiru_25	10	0	0	0	0	0	0
spiru_3	10	0	0	0	0	0	0
spiru_4	10	0	0	0	0	0	0
spiru_5	10	0	0	0	0	0	0
spiru_6	10	0	0	0	0	0	0
spiru_7	10	0	0	0	0	0	0
spiru_8	10	0	0	0	0	0	0
spiru_9	10	0	0	0	0	0	0
wheat_1	10	0	0	0	0	0	0
wheat_10	10	0	0	0	0	0	0
wheat_11	10	1	1	0	0	0	0
wheat_12	10	0	0	2	0	0	0
wheat_13	10	3	3	0	0	0	0
wheat_14	10	6	1	0	0	0	0
wheat_15	10	0	0	0	0	0	0
wheat_16	10	0	0	0	0	0	0
wheat_17	10	16	16	0	0	0	0
wheat_18	10	0	0	0	0	0	0
wheat_19	10	0	0	0	0	0	0
wheat_2	10	14	0	0	0	0	0
wheat_20	10	0	0	0	0	0	0
wheat_21	10	1	1	0	0	0	0
wheat_22	10	1	1	0	0	0	0
wheat_23	10	0	0	0	0	0	0
wheat_24	10	2	2	0	0	0	0
wheat_25	10	0	0	0	0	0	0
wheat_3	10	8	0	0	0	0	0
wheat_4	10	0	0	0	0	0	0
wheat_5	10	0	0	0	0	0	0
wheat_6	10	3	0	0	0	0	0
wheat_7	10	16	0	0	0	0	0
wheat_8	10	1	1	0	0	0	0
wheat_9	10	18	0	0	0	0	0
yeast_1	10	4	4	0	0	0	0
yeast_10	10	18	18	0	0	0	0
yeast_11	10	12	12	0	0	0	0
yeast_12	10	6	6	0	0	0	0
yeast_13	10	21	21	0	0	0	0
yeast_14	10	0	0	1	0	0	0
yeast_15	10	10	0	0	0	0	0
yeast_16	10	3	3	0	0	0	0
yeast_17	10	4	0	0	0	0	0
yeast_18	10	1	1	0	0	0	0
yeast_19	10	17	17	0	0	0	0
yeast_2	10	16	16	0	0	0	0
yeast_20	10	2	2	0	0	0	0
yeast_21	10	30	30	1	0	0	0
yeast_22	10	0	0	0	0	0	0
yeast_23	10	9	9	0	0	0	0
yeast_24	10	12	12	0	0	0	0
yeast_25	10	0	0	0	0	0	0
yeast_3	10	8	8	0	0	0	0
yeast_4	10	4	4	0	0	0	0
yeast_5	10	14	14	1	0	0	0
yeast_6	10	9	0	0	0	0	0
yeast_7	10	0	0	0	0	0	0
yeast_8	10	0	0	0	0	0	0
yeast_9	10	0	0	0	0	0	0
blood_1	11	0	0	0	0	0	0
blood_10	11	0	0	0	0	0	0
blood_11	11	0	0	0	0	0	0
blood_12	11	0	0	0	0	0	0
blood_13	11	0	0	0	0	0	0
blood_14	11	0	0	0	0	0	0
blood_15	11	0	0	0	0	0	0
blood_16	11	1	1	0	0	0	0
blood_17	11	0	0	0	0	0	0
blood_18	11	0	0	0	0	0	0
blood_19	11	0	0	0	0	0	0
blood_2	11	0	0	0	0	0	0
blood_20	11	0	0	0	0	0	0
blood_21	11	0	0	0	0	0	0
blood_22	11	0	0	0	0	0	0
blood_23	11	0	0	0	0	0	0
blood_24	11	0	0	0	0	0	0
blood_25	11	0	0	0	0	0	0
blood_3	11	0	0	0	0	0	0
blood_4	11	0	0	0	0	0	0
blood_5	11	0	0	0	0	0	0
blood_6	11	0	0	0	0	0	0
blood_7	11	0	0	0	0	0	0
blood_8	11	0	0	0	0	0	0
blood_9	11	0	0	0	0	0	0
bone_1	11	1	1	0	0	0	0
bone_10	11	0	0	0	0	0	0
bone_11	11	0	0	0	0	0	0
bone_12	11	0	0	0	0	0	0
bone_13	11	0	0	0	0	0	0
bone_14	11	0	0	0	0	0	0
bone_15	11	0	0	0	0	0	0
bone_16	11	0	0	0	0	0	0
bone_17	11	0	0	0	0	0	0
bone_18	11	0	0	0	0	0	0
bone_19	11	5	1	0	0	0	0
bone_2	11	1	1	0	0	0	0
bone_20	11	0	0	0	0	0	0
bone_21	11	0	0	0	0	0	0
bone_22	11	0	0	0	0	0	0
bone_23	11	0	0	0	0	0	0
bone_24	11	0	0	0	0	0	0
bone_25	11	0	0	0	0	0	0
bone_3	11	1	1	0	0	0	0
bone_4	11	0	0	0	0	0	0
bone_5	11	0	0	0	0	0	0
bone_6	11	0	0	0	0	0	0
bone_7	11	0	0	0	0	0	0
bone_8	11	0	0	0	0	0	0
bone_9	11	0	0	0	0	0	0
chlor_1	11	0	0	0	0	0	0
chlor_10	11	0	0	0	0	0	0
chlor_11	11	0	0	0	0	0	0
chlor_12	11	0	0	0	0	0	0
chlor_13	11	4	4	0	0	0	0
chlor_14	11	0	0	0	0	0	0
chlor_15	11	0	0	0	0	0	0
chlor_16	11	0	0	0	0	0	0
chlor_17	11	8	8	0	0	0	0
chlor_18	11	0	0	0	0	0	0
chlor_19	11	6	0	0	0	0	0
chlor_2	11	3	3	0	0	0	0
chlor_20	11	21	21	0	0	0	0
chlor_21	11	2	2	0	0	0	0
chlor_22	11	2	2	0	0	0	0
chlor_23	11	0	0	0	0	0	0
chlor_24	11	0	0	0	0	0	0
chlor_25	11	0	0	0	0	0	0
chlor_3	11	0	0	0	0	0	0
chlor_4	11	2	2	0	0	0	0
chlor_5	11	8	8	0	0	0	0
chlor_6	11	10	10	0	0	0	0
chlor_7	11	0	0	0	0	0	0
chlor_8	11	0	0	0	0	0	0
chlor_9	11	6	6	0	0	0	0
fungi_1	11	0	0	0	0	0	0
fungi_10	11	0	0	0	0	0	0
fungi_11	11	0	0	0	0	0	0
fungi_12	11	0	0	0	0	0	0
fungi_13	11	0	0	0	0	0	0
fungi_14	11	0	0	0	0	0	0
fungi_15	11	0	0	0	0	0	0
fungi_16	11	0	0	0	0	0	0
fungi_17	11	0	0	0	0	0	0
fungi_18	11	0	0	0	0	0	0
fungi_19	11	0	0	0	0	0	0
fungi_2	11	4	4	0	0	0	0
fungi_20	11	0	0	0	0	0	0
fungi_21	11	0	0	0	0	0	0
fungi_22	11	0	0	0	0	0	0
fungi_23	11	0	0	0	0	0	0
fungi_24	11	0	0	0	0	0	0
fungi_25	11	0	0	0	0	0	0
fungi_3	11	0	0	0	0	0	0
fungi_4	11	0	0	0	0	0	0
fungi_5	11	0	0	0	0	0	0
fungi_6	11	0	0	0	0	0	0
fungi_7	11	0	0	0	0	0	0
fungi_8	11	0	0	0	0	0	0
fungi_9	11	0	0	0	0	0	0
hemp_1	11	3	3	2	0	0	0
hemp_10	11	3	3	0	0	0	0
hemp_11	11	0	0	0	0	0	0
hemp_12	11	0	0	0	0	0	0
hemp_13	11	13	13	1	0	0	0
hemp_14	11	2	2	0	0	0	0
hemp_15	11	0	0	0	0	0	0
hemp_16	11	7	7	0	0	0	0
hemp_17	11	0	0	0	0	0	0
hemp_18	11	0	0	0	0	0	0
hemp_19	11	6	0	0	0	0	0
hemp_2	11	5	1	0	0	0	0
hemp_20	11	3	3	0	0	0	0
hemp_21	11	0	0	0	0	0	0
hemp_22	11	6	6	0	0	0	0
hemp_23	11	4	4	0	0	0	0
hemp_24	11	1	1	0	0	0	0
hemp_25	11	9	9	0	0	0	0
hemp_3	11	0	0	0	0	0	0
hemp_4	11	0	0	0	0	0	0
hemp_5	11	3	3	0	0	0	0
hemp_6	11	0	0	2	0	0	0
hemp_7	11	0	0	0	0	0	0
hemp_8	11	0	0	1	0	0	0
hemp_9	11	1	1	0	0	0	0
lupine_1	11	0	0	0	0	0	0
lupine_10	11	0	0	0	0	0	0
lupine_11	11	0	0	0	0	0	0
lupine_12	11	0	0	0	0	0	0
lupine_13	11	0	0	0	0	0	0
lupine_14	11	0	0	0	0	0	0
lupine_15	11	11	0	0	0	0	0
lupine_16	11	0	0	0	0	0	0
lupine_17	11	0	0	0	0	0	0
lupine_18	11	0	0	0	0	0	0
lupine_19	11	0	0	0	0	0	0
lupine_2	11	0	0	0	0	0	0
lupine_20	11	0	0	0	0	0	0
lupine_21	11	0	0	0	0	0	0
lupine_22	11	0	0	0	0	0	0
lupine_23	11	0	0	0	0	0	0
lupine_24	11	0	0	0	0	0	0
lupine_25	11	0	0	0	0	0	0
lupine_3	11	4	0	0	0	0	0
lupine_4	11	0	0	0	0	0	0
lupine_5	11	0	0	0	0	0	0
lupine_6	11	0	0	0	0	0	0
lupine_7	11	0	0	0	0	0	0
lupine_8	11	0	0	0	0	0	0
lupine_9	11	0	0	0	0	0	0
pollen_1	11	4	4	0	0	0	0
pollen_10	11	11	11	0	0	0	0
pollen_11	11	6	6	0	0	0	0
pollen_12	11	8	8	0	0	0	0
pollen_13	11	7	7	0	0	0	0
pollen_14	11	1	1	0	0	0	0
pollen_15	11	1	1	0	0	0	0
pollen_16	11	7	1	0	0	0	0
pollen_17	11	15	15	0	0	0	0
pollen_18	11	3	0	0	0	0	0
pollen_19	11	0	0	0	0	0	0
pollen_2	11	7	7	0	0	0	0
pollen_20	11	0	0	0	0	0	0
pollen_21	11	11	11	0	0	0	0
pollen_22	11	0	0	0	0	0	0
pollen_23	11	0	0	0	0	0	0
pollen_24	11	6	1	0	0	0	0
pollen_25	11	0	0	0	0	0	0
pollen_3	11	6	1	0	0	0	0
pollen_4	11	0	0	0	0	0	0
pollen_5	11	2	2	0	0	0	0
pollen_6	11	7	7	0	0	0	0
pollen_7	11	0	0	0	0	0	0
pollen_8	11	0	0	0	0	0	0
pollen_9	11	1	1	0	0	0	0
spiru_1	11	0	0	0	0	0	0
spiru_10	11	0	0	0	0	0	0
spiru_11	11	0	0	0	0	0	0
spiru_12	11	0	0	0	0	0	0
spiru_13	11	0	0	0	0	0	0
spiru_14	11	0	0	0	0	0	0
spiru_15	11	0	0	0	0	0	0
spiru_16	11	0	0	0	0	0	0
spiru_17	11	0	0	0	0	0	0
spiru_18	11	0	0	0	0	0	0
spiru_19	11	0	0	0	0	0	0
spiru_2	11	0	0	0	0	0	0
spiru_20	11	0	0	0	0	0	0
spiru_21	11	0	0	0	0	0	0
spiru_22	11	0	0	0	0	0	0
spiru_23	11	0	0	0	0	0	0
spiru_24	11	0	0	0	0	0	0
spiru_25	11	0	0	0	0	0	0
spiru_3	11	0	0	0	0	0	0
spiru_4	11	0	0	0	0	0	0
spiru_5	11	0	0	0	0	0	0
spiru_6	11	0	0	0	0	0	0
spiru_7	11	0	0	0	0	0	0
spiru_8	11	0	0	0	0	0	0
spiru_9	11	0	0	0	0	0	0
wheat_1	11	1	1	0	0	0	0
wheat_10	11	2	2	0	0	0	0
wheat_11	11	10	10	0	0	0	0
wheat_12	11	0	0	0	0	0	0
wheat_13	11	3	3	0	0	0	0
wheat_14	11	14	14	1	0	0	0
wheat_15	11	12	12	0	0	0	0
wheat_16	11	0	0	0	0	0	0
wheat_17	11	24	24	0	0	0	0
wheat_18	11	1	1	0	0	0	0
wheat_19	11	0	0	0	0	0	0
wheat_2	11	13	0	0	0	0	0
wheat_20	11	0	0	0	0	0	0
wheat_21	11	6	6	0	0	0	0
wheat_22	11	0	0	0	0	0	0
wheat_23	11	12	12	0	0	0	0
wheat_24	11	16	16	0	0	0	0
wheat_25	11	14	0	0	0	0	0
wheat_3	11	14	1	0	0	0	0
wheat_4	11	6	6	0	0	0	0
wheat_5	11	4	4	0	0	0	0
wheat_6	11	43	0	0	0	0	0
wheat_7	11	13	0	0	0	0	0
wheat_8	11	0	0	0	0	0	0
wheat_9	11	12	0	0	0	0	0
yeast_1	11	2	2	0	0	0	0
yeast_10	11	15	15	0	0	0	0
yeast_11	11	23	23	0	0	0	0
yeast_12	11	5	5	0	0	0	0
yeast_13	11	22	22	0	0	0	0
yeast_14	11	0	0	1	0	0	0
yeast_15	11	1	1	0	0	0	0
yeast_16	11	24	24	0	0	0	0
yeast_17	11	4	0	0	0	0	0
yeast_18	11	0	0	0	0	0	0
yeast_19	11	16	16	0	0	0	0
yeast_2	11	23	23	0	0	0	0
yeast_20	11	8	8	0	0	0	0
yeast_21	11	22	22	1	0	0	0
yeast_22	11	0	0	0	0	0	0
yeast_23	11	18	18	0	0	0	0
yeast_24	11	20	20	0	0	0	0
yeast_25	11	0	0	0	0	0	0
yeast_3	11	18	18	0	0	0	0
yeast_4	11	18	18	0	0	0	0
yeast_5	11	17	17	0	0	0	0
yeast_6	11	0	0	0	0	0	0
yeast_7	11	2	2	0	0	0	0
yeast_8	11	25	25	0	0	0	0
[truncated: 10,349 more rows]

## Sheet: chemistry1_amount_composition
ID	amount (ng_µg)	HMBD (%)	NER (%)	NYF (%)	C13 (%)	ACA (%)	C15 (%)	C17 (%)
blood_01	0.693064	3.76759	16.159	23.2864	4.44003	17.3042	15.9347	19.1081
blood_02	0.392693	4.18754	8.64515	38.6355	5.77532	15.4141	13.5458	13.7966
blood_03	2.05416	0	0	46.7807	8.16038	14.7191	6.64496	23.6948
blood_04	3.28171	3.9529	5.54332	49.5431	3.17403	16.1056	8.6652	13.0158
blood_05	8.01656	7.80013	29.1622	24.4451	2.11988	20.1034	8.92424	7.44502
blood_06	0.455061	5.01911	18.9447	26.8724	5.23476	19.5802	8.78121	15.5677
blood_07	0.451859	0	0	46.8109	8.63549	13.9014	14.497	16.1552
blood_08	3.81796	6.44102	13.7589	27.6493	5.80613	21.7952	13.8111	10.7383
blood_09	0.527705	0.559633	8.47539	42.4553	7.32738	14.7983	16.6574	9.72667
blood_10	3.3667	2.35521	24.7574	23.5768	4.85183	16.8741	9.9624	17.6223
blood_11	1.57047	3.6137	14.5607	37.6678	7.11509	12.5189	7.63364	16.89
blood_12	0.235485	0	21.0379	35.0201	4.49677	1.90415	11.3079	26.2331
blood_13	8.62237	5.24992	15.6392	28.2185	5.28219	17.6136	14.4825	13.5142
blood_14	2.07646	5.54409	13.1148	31.9768	4.77749	18.7354	14.3257	11.5257
blood_15	0.421998	0	24.4714	26.384	8.79923	16.1244	4.84183	19.3792
blood_16	0.430814	4.39545	13.1042	31.3959	5.60047	18.9007	11.9365	14.6668
blood_17	0.443057	7.40903	18.0716	34.2272	4.00103	19.2611	10.932	6.09806
blood_18	0.959273	6.03767	12.211	33.1966	4.64251	20.7769	14.0399	9.09546
blood_19	0.286811	0	0	58.9463	6.13173	7.41639	12.4096	15.096
blood_20	0.903907	0	1.54491	48.4728	5.31017	15.0396	9.95238	19.6801
blood_22	1.60759	8.13539	16.9446	34.5799	4.40601	17.7785	7.88491	10.2707
blood_23	1.31488	3.69772	8.27989	36.7559	6.49641	19.0465	14.0316	11.6919
blood_24	0.816096	7.70228	18.1653	31.5007	4.61103	20.4451	10.2147	7.36086
blood_25	1.57348	4.04294	3.34365	48.7885	4.62661	13.1273	12.4942	13.5768
blood_26	3.01206	6.07251	15.4661	30.3536	4.74308	19.8568	13.5757	9.93218
blood_27	3.70517	6.63083	17.4097	31.8145	4.33221	23.1524	8.6321	8.02834
blood_28	1.06754	1.41486	0.771347	44.534	6.12054	8.83167	21.5165	16.8111
blood_29	1.49959	5.15243	23.9007	29.8536	3.27141	17.2859	11.1297	9.40623
blood_30	1.07641	4.37369	7.78723	39.6824	4.15551	15.6738	12.8192	15.5082
bone_01	2.4199	2.28564	1.22893	41.5419	10.0872	14.1368	19.7721	10.9475
bone_02	0.711555	4.83459	14.1325	29.0334	10.6586	13.2979	13.671	14.372
bone_03	2.41835	3.92968	10.0128	38.1533	6.54775	18.0048	11.5859	11.7657
bone_04	2.00689	4.40908	10.4295	36.6823	7.11799	19.321	11.7088	10.3313
bone_05	2.67287	3.86951	9.99359	39.2437	3.64469	22.2737	10.0517	10.9231
bone_06	1.6273	0.571816	0	52.0416	13.3761	8.77884	10.2479	14.9837
bone_07	3.39934	2.55075	0.407704	50.9131	9.41846	10.9631	14.9479	10.799
bone_08	3.6425	4.57666	8.3496	42.3337	13.9728	11.2388	8.41606	11.1125
bone_09	1.99768	3.59303	10.1292	40.3988	14.9486	10.8675	11.2202	8.84266
bone_10	5.68049	4.91095	18.7042	16.5747	7.42387	23.8397	12.7547	15.7919
bone_11	2.55925	2.55646	0.215345	46.6957	9.82169	15.0206	14.3315	11.3587
bone_12	2.23598	5.32488	10.9298	40.289	13.874	11.5731	5.87702	12.1322
bone_13	1.58469	2.06749	0	49.9421	10.8719	10.9555	14.366	11.7969
bone_14	1.8594	2.18716	0	48.1422	8.46462	13.0003	15.1465	13.0593
bone_15	1.74835	3.50925	8.09609	41.4116	8.82647	11.1596	13.5539	13.4431
bone_16	3.21086	3.40431	4.47779	40.4882	12.7881	8.99329	19.8782	9.97012
bone_17	3.11079	3.86245	6.44541	39.5899	9.06651	18.8113	12.5193	9.70517
bone_18	0.583035	0	0	45.0224	17.7139	7.98123	17.8116	11.4709
bone_19	2.36973	4.32975	12.8862	33.04	13.2647	15.1907	10.6466	10.642
bone_20	1.38308	4.34768	8.87669	34.4207	11.6581	14.9849	8.23904	17.4729
bone_21	1.00263	5.30038	20.8619	14.9293	13.1008	22.7943	11.8457	11.1677
bone_22	2.56343	3.10784	11.413	30.3774	19.43	8.1419	15.1712	12.3588
bone_23	1.95085	2.76278	5.89715	35.7196	19.0284	7.39652	13.7597	15.436
bone_24	3.10848	4.17292	2.03642	43.7003	11.5971	16.2544	10.8937	11.3452
bone_25	3.54047	3.46658	7.7143	39.0536	9.48733	18.4318	11.2737	10.5726
bone_26	0.540478	0	0	47.0343	18.7099	5.49499	14.0676	14.6932
bone_27	1.94117	0.778005	0.751659	52.3504	11.3484	16.3603	14.5587	3.85243
bone_28	3.35344	3.7484	9.0822	37.3612	10.4622	16.8254	12.0899	10.4307
bone_29	1.07599	2.35474	1.87851	44.035	12.0788	11.2566	18.2461	10.1503
bone_30	2.50421	4.92842	24.4544	8.20935	17.6009	24.1382	4.39578	16.2729
spiru_01	12.6009	4.38612	18.5593	39.4992	5.07636	16.9149	12.1833	3.38084
spiru_02	13.8708	4.47337	12.5205	38.3552	8.1639	18.4566	13.2821	4.74828
spiru_03	0.643225	0.604502	12.4618	33.5505	13.6446	8.62042	20.6019	10.5163
spiru_04	9.8941	6.17391	14.7296	35.4712	5.89507	22.8854	11.1926	3.65224
spiru_05	1.31219	1.80938	10.4125	41.6534	12.1127	8.89616	16.7289	8.38702
spiru_06	1.94189	2.83357	7.06917	40.2498	11.6835	9.95146	17.7385	10.474
spiru_09	6.50688	5.88129	15.7338	37.942	4.10104	27.8142	6.78131	1.7464
spiru_10	4.4241	4.65882	12.4166	42.1891	5.05723	21.1933	11.7009	2.7841
spiru_11	9.14451	4.14629	13.2485	34.0333	7.96993	23.3053	13.3564	3.94032
spiru_13	6.86383	6.34977	11.6613	42.3985	6.77249	17.0869	11.1134	4.6176
spiru_15	0.281841	0	0	52.9103	16.5718	18.9141	4.80731	6.79658
spiru_16	6.21544	2.96365	0	51.9545	8.30035	20.1799	12.0271	4.57456
spiru_17	10.2142	6.4822	12.7838	34.0301	8.45539	18.2471	12.6093	7.39207
spiru_18	8.15476	6.79181	11.9619	38.6104	7.36939	19.0331	9.99266	6.24074
spiru_19	0.537771	0	0	46.6179	18.6869	15.1014	11.9901	7.60368
spiru_20	0.41809	0.13655	0	43.5809	21.7657	17.8967	10.8085	5.81172
spiru_21	9.40522	6.68869	15.6115	31.1323	6.08421	24.8652	10.4153	5.20284
spiru_22	12.1979	7.84534	14.6246	35.1488	6.90839	20.5532	10.2654	4.65435
spiru_23	1.78736	0.494483	0.797066	46.0539	11.1577	15.02	18.616	7.86092
spiru_24	8.59586	6.93559	15.6649	30.732	6.06902	24.8297	10.3087	5.4601
spiru_25	9.23521	4.10738	1.30065	48.6399	7.23012	21.9975	11.7357	4.98878
spiru_26	8.2667	5.43108	13.9985	36.0544	5.99059	21.249	12.3447	4.93164
spiru_27	1.63406	0.303172	6.42944	48.4488	14.5721	16.3734	6.57657	7.29652
spiru_28	2.70065	9.50527	20.2755	30.8198	5.75883	19.2135	9.13834	5.28872
spiru_30	1.91335	5.19915	15.8657	38.1005	5.60503	14.4478	13.9917	6.7902
yeast_01	7.714	5.09253	12.1954	35.5576	7.47682	21.2912	11.2026	7.18385
yeast_02	1.89704	4.65583	16.937	30.2933	6.99588	14.9726	17.0356	9.10982
yeast_03	5.95524	6.36425	18.9724	22.0512	8.05696	23.4192	13.4856	7.65039
yeast_04	6.15103	4.65852	17.5652	30.0634	6.88235	24.366	9.69423	6.77029
yeast_05	10.1138	6.11097	19.7742	23.7417	6.23024	28.4188	9.7422	5.9819
yeast_06	5.46054	9.02242	19.4059	29.5088	5.19128	25.2138	7.30339	4.35442
yeast_07	4.69881	6.97624	20.8272	29.8425	5.6534	20.1417	10.0838	6.47517
yeast_08	5.84648	4.89763	17.6842	34.2796	7.99438	15.2023	12.0123	7.9296
yeast_09	5.67551	5.14913	15.9546	35.9941	7.53806	21.2926	9.63316	4.43844
yeast_10	6.54827	7.4735	19.3185	28.4256	4.9387	27.5946	7.52529	4.7238
yeast_11	3.21572	5.80618	17.9138	31.288	6.6359	23.5685	9.95001	4.83767
yeast_12	2.17294	7.27118	15.5072	27.7007	7.02432	27.2562	8.78	6.46046
yeast_13	1.6052	4.88434	16.6143	35.2965	8.93544	16.0822	12.4716	5.71561
yeast_14	3.64377	5.58665	16.0163	27.9065	8.15474	20.6728	12.2663	9.39668
yeast_15	2.03564	6.02922	17.7651	31.9691	7.25213	22.1364	9.58237	5.26567
yeast_16	4.85248	7.21351	18.5185	27.6165	6.60065	23.144	10.2097	6.69714
yeast_17	1.62504	3.83226	3.7773	44.4991	11.3732	20.6463	9.19737	6.67442
yeast_18	1.97971	6.28664	13.1931	34.8277	8.9843	18.8211	12.2931	5.594
yeast_19	2.15305	5.89787	15.8292	28.206	6.99154	26.7888	10.4008	5.88577
yeast_20	4.66875	6.97669	19.9925	27.4418	6.2734	28.3127	4.83729	6.16551
yeast_21	2.02912	5.15036	16.539	26.9364	5.28925	25.1445	12.2131	8.72744
yeast_22	1.88282	6.11794	22.617	26.1093	6.64373	27.5368	6.71507	4.26014
yeast_23	4.0716	4.88185	12.4706	37.0316	7.64148	22.4351	9.8459	5.69346
yeast_24	3.75848	5.75657	16.0758	32.8225	8.55549	20.4094	11.1082	5.27207
yeast_25	1.26457	8.61575	20.7997	22.672	9.81217	24.5496	6.79005	6.76076
yeast_26	7.22388	6.98509	16.0321	29.5364	6.61959	25.7982	8.49003	6.53868
yeast_27	1.55895	5.9987	11.6321	33.099	11.8209	21.1674	7.39884	8.88307
yeast_28	11.6497	5.75515	19.9382	30.6706	5.02171	25.2334	7.96315	5.41774
yeast_29	8.10949	4.47456	16.3615	27.842	7.68266	22.1398	12.9147	8.58471
yeast_30	0.593755	7.99229	31.2234	19.9003	9.163	17.347	9.13653	5.23743
fungi_01	2.86561	7.41687	14.6689	33.2463	6.60083	22.9984	11.3942	3.67451
fungi_02	4.56927	6.35371	20.1496	31.5584	6.66118	22.9455	9.54344	2.78821
fungi_03	5.27577	7.24598	21.5519	32.8749	5.4013	21.5476	8.85258	2.52568
fungi_04	6.62917	7.17367	23.1123	27.9796	5.46769	18.9922	10.7999	6.47451
fungi_05	6.40788	7.37275	9.50322	44.8046	6.39143	19.7381	9.47352	2.71635
fungi_06	6.83335	8.79965	13.4682	35.4919	5.06149	24.8039	8.67368	3.7012
fungi_07	4.52451	7.0813	15.9489	30.7015	7.81438	20.759	12.4863	5.2085
fungi_08	8.74148	5.0975	5.14069	41.2725	7.64161	20.4382	14.3587	6.0509
fungi_09	2.96878	4.75699	16.7367	38.4437	10.194	17.7623	10.3761	1.73026
fungi_10	13.6071	8.95789	9.39527	40.4064	5.53701	23.9909	8.87139	2.84116
fungi_11	3.36949	6.24122	18.8277	38.8422	5.36708	15.3907	11.5616	3.76947
fungi_12	3.36127	5.18036	14.2715	32.9194	11.7334	19.4342	13.2158	3.24534
fungi_13	7.23468	6.87783	8.15922	43.2341	7.92692	17.197	11.9973	4.60765
fungi_14	6.36732	6.24086	16.363	30.6306	8.99087	21.4189	11.4673	4.88843
fungi_15	0.374698	0.255205	18.2023	30.2992	13.9419	31.3333	2.81302	3.15508
fungi_16	10.8464	6.21235	16.5393	32.0509	7.50049	16.8015	15.345	5.55034
fungi_17	8.59561	5.63746	19.889	29.9101	9.64748	17.125	14.2851	3.50582
fungi_18	12.4559	6.37581	20.5171	32.0237	6.79641	18.9597	11.5233	3.80389
fungi_19	9.51722	7.7603	15.544	30.6589	7.8301	24.2822	11.3004	2.62408
fungi_20	10.9568	7.0193	21.7416	22.9255	5.89119	24.8464	12.5525	5.02358
fungi_21	6.78647	4.67803	20.2097	31.5528	9.22778	20.1811	11.4242	2.72632
fungi_22	8.31115	7.35122	17.9964	28.2424	7.95027	23.9737	10.6202	3.86586
fungi_23	1.46781	4.40332	18.7683	33.4774	11.4976	19.203	9.22829	3.42211
fungi_25	2.55291	5.7881	21.4217	43.1057	7.69383	11.4803	7.84539	2.66488
fungi_26	9.40529	7.51975	17.8858	29.0116	5.60315	24.0653	11.9443	3.97013
fungi_28	1.17476	2.73423	5.14575	47.1853	12.8225	5.7564	19.1614	7.19443
fungi_29	6.73456	6.85288	16.1384	33.7331	8.94269	14.9686	14.9355	4.42889
fungi_30	6.3484	8.09824	19.0645	35.541	5.85752	19.3215	9.30294	2.81428
chlor_01	0.834939	0.554554	19.5559	22.8012	8.48101	30.1904	10.6315	7.78534
chlor_02	0.618453	3.82968	20.8696	21.4585	8.41505	24.2146	13.9214	7.29114
chlor_03	1.94958	4.4595	15.0182	35.673	6.37634	16.405	15.679	6.38891
chlor_04	1.3996	6.70982	17.6323	32.4016	5.82215	21.7848	9.27346	6.37585
chlor_05	3.5911	4.78949	17.4986	29.7045	7.54282	27.0168	8.59188	4.85594
chlor_06	0.622991	3.25546	25.3993	22.478	11.8832	16.2117	12.4531	8.31918
chlor_08	3.4308	6.69504	17.9725	28.5174	7.53585	20.131	11.7642	7.38392
chlor_09	2.4297	5.08271	21.1454	27.9324	9.86186	22.1546	10.5542	3.2689
chlor_10	5.61703	8.22312	15.8552	32.6944	6.06758	19.8561	10.5781	6.72548
chlor_11	6.17206	5.46526	15.5923	34.5038	5.80079	18.7509	12.2737	7.61328
chlor_12	3.38908	4.70775	17.7782	27.4035	11.2021	24.1454	9.26146	5.50162
chlor_13	9.13307	6.49296	16.7849	30.5997	5.36805	26.1047	9.44935	5.20033
chlor_14	3.51189	3.77823	21.2839	31.808	11.1985	17.8868	9.43982	4.60475
chlor_15	4.63174	5.93837	17.6818	31.0986	6.54735	21.012	10.3475	7.37435
chlor_16	5.7485	4.48685	14.5642	29.5952	7.59862	24.0768	12.665	7.01328
chlor_17	7.472	7.3855	19.433	31.6336	4.65481	21.8334	7.97352	7.08617
chlor_18	5.40106	9.72007	22.5698	28.977	7.38359	16.7227	7.15917	7.46769
chlor_19	5.63598	5.73732	16.5	32.7246	7.11227	20.0191	10.639	7.26766
chlor_20	4.70721	3.43581	17.7363	31.3619	7.38363	19.8662	13.3783	6.83778
chlor_21	2.64409	4.67356	17.3358	32.8707	8.03783	24.3895	6.6796	6.01309
chlor_23	1.87784	4.15174	14.3353	31.4439	16.3892	10.9495	14.2489	8.4814
chlor_24	4.79715	3.91135	15.169	25.685	6.36778	29.949	10.6239	8.294
chlor_25	1.13522	3.79282	15.3516	25.9562	11.2375	23.5438	12.2694	7.84875
chlor_26	0.668632	1.50146	17.7379	31.373	14.2405	16.5587	12.3288	6.25955
chlor_27	2.52894	4.2371	11.608	34.2104	13.7931	13.1339	15.9533	7.06429
chlor_29	4.35858	4.42071	17.8752	32.9407	5.06845	23.0389	10.9261	5.73003
chlor_30	0.67791	4.7485	14.7449	25.0117	9.42553	21.6839	14.2628	10.1225
wheat_01	4.57553	5.33745	11.5411	41.9023	6.99293	17.6252	11.0855	5.51558
wheat_02	1.68411	7.87743	20.373	28.496	6.50312	18.3728	10.9227	7.45492
wheat_03	3.0988	6.45493	17.0779	34.6199	8.7773	15.4437	10.212	7.41418
wheat_04	0.425754	1.80997	1.14665	52.508	8.96185	11.4774	13.687	10.4091
wheat_05	1.37861	7.47427	25.2527	19.6333	3.51101	27.7451	8.03681	8.34678
wheat_06	1.43317	6.8028	29.6299	19.3986	3.1865	23.4786	9.76854	7.73507
wheat_07	2.63908	3.51124	9.63514	50.5763	5.40452	14.0194	11.4869	5.36642
wheat_08	2.23558	4.73066	10.6851	48.8018	8.64145	10.7286	11.0871	5.32532
wheat_09	2.16119	6.57176	29.5591	19.506	8.48695	22.7516	6.53116	6.59348
wheat_10	2.2141	9.23251	26.8697	16.0996	2.65867	29.5993	7.4015	8.13871
wheat_11	3.09796	7.96015	22.4837	24.8129	5.45026	23.6656	8.57465	7.05276
wheat_12	2.76332	4.94305	11.4859	38.1355	5.61935	19.3185	12.413	8.08467
wheat_13	1.94618	4.0429	13.5423	36.1741	7.4067	12.0387	15.3026	11.4927
wheat_14	1.51979	5.55715	9.78772	40.5588	9.06687	12.4776	10.7542	11.7976
wheat_15	3.7146	4.63073	12.6391	43.1339	7.16411	15.7554	11.3036	5.37314
wheat_16	3.00965	7.05545	22.854	26.6506	3.73897	21.1953	11.2779	7.22775
wheat_17	3.60417	6.27274	16.4648	34.815	7.79631	14.5074	12.2433	7.90039
wheat_18	1.30293	9.42709	25.5422	24.2143	9.20181	12.4013	8.83611	10.3771
wheat_19	1.24135	3.704	5.35255	49.4606	7.65919	16.0076	9.59611	8.22001
wheat_20	2.28599	7.97505	22.0136	28.9396	3.66504	21.8341	8.66065	6.91189
wheat_21	3.65349	2.35153	0	55.468	8.34448	13.0239	12.9868	7.8253
wheat_22	3.11775	6.16351	27.9483	20.6851	4.16956	23.6363	9.37376	8.02351
wheat_23	3.22224	2.22245	0.0281648	50.8126	11.34	14.2707	13.1266	8.19935
wheat_24	3.47331	6.27035	12.4482	41.1783	9.13061	15.2975	10.5121	5.16303
wheat_25	3.5999	5.54137	12.4397	40.1049	7.76513	15.9426	11.7294	6.47684
wheat_26	0.767417	7.52435	24.3761	14.3809	7.76036	30.7331	5.99176	9.23336
wheat_27	8.44964	9.22412	26.9587	21.3426	4.49052	23.7853	6.83036	7.36843
wheat_28	4.4843	3.59062	13.4954	46.8593	8.43532	11.4317	13.1607	3.02684
wheat_29	5.63891	4.3286	9.54046	44.6103	6.50714	15.9436	11.7207	7.34927
wheat_30	4.80521	4.24489	5.67079	47.9953	7.09676	15.3663	11.5099	8.11607
lupine_01	4.43622	2.43362	0.515723	53.9243	8.38138	13.3042	11.5589	9.88199
lupine_02	2.25131	3.55686	9.96196	44.4667	7.0694	16.1904	11.8583	6.8963
lupine_03	2.01879	3.15497	9.35885	47.0783	8.24539	11.0668	14.8619	6.23376
lupine_05	1.48903	3.64271	29.4639	25.2524	11.3292	21.7578	4.40451	4.14942
lupine_08	3.61961	0.610752	1.42143	52.662	11.5657	10.6951	12.7836	10.2613
lupine_09	2.34642	2.22677	5.83466	49.5571	12.7475	3.79828	15.8204	10.0152
lupine_10	8.67879	4.76055	18.1555	39.0927	5.99485	15.7945	10.4193	5.78257
lupine_11	2.60975	5.50214	20.7459	24.7709	6.62512	28.8089	7.06786	6.47913
lupine_12	1.49995	3.74994	14.3447	43.25	6.3582	13.1483	11.3046	7.84419
lupine_13	4.47539	2.69499	6.55278	41.9202	11.6493	13.7917	12.711	10.68
lupine_14	1.98159	4.60092	26.5313	27.7322	7.02716	20.2218	7.21109	6.67558
lupine_15	7.83652	4.03223	13.4831	42.0766	5.96055	14.1566	12.4803	7.81067
lupine_16	0.76943	2.68266	3.57456	47.142	8.96031	12.0863	14.4164	11.1378
lupine_17	3.96558	3.24824	7.02301	44.7949	8.91924	13.2608	12.8988	9.85497
lupine_18	6.282	3.16813	4.90767	47.8145	10.7976	13.9869	11.4693	7.85579
lupine_19	6.15355	2.30805	1.22126	50.289	10.2755	16.4762	11.8378	7.59212
lupine_20	5.45118	2.83087	9.61482	45.7611	8.11319	11.0715	14.7911	7.81735
lupine_21	6.48809	2.81217	6.85001	42.7793	9.92059	17.1084	11.2295	9.30005
lupine_22	4.48317	1.00197	4.31264	46.9791	7.27393	13.4553	10.1153	16.8618
lupine_23	3.14489	4.85443	11.7833	34.8184	12.8737	14.9332	11.1331	9.60376
lupine_24	3.4259	1.99893	1.04784	48.9698	12.2324	10.7006	13.4974	11.5531
lupine_25	6.60689	2.58032	7.72796	48.0184	8.47697	11.9806	11.1976	10.0181
lupine_26	1.12283	2.52829	3.67465	48.9472	8.54752	12.5182	13.4348	10.3494
lupine_27	6.87117	4.25789	10.4614	39.8348	8.38305	15.6166	12.3253	9.12106
lupine_28	1.44211	4.104	21.2137	24.2401	13.8013	18.7282	8.6097	9.30295
lupine_29	5.20197	2.81412	7.30666	44.6764	8.26219	12.4469	11.941	12.5527
lupine_30	5.0576	3.40878	7.01513	43.5392	7.70444	14.4149	13.9751	9.94245
pollen_01	2.69397	6.83005	18.3659	39.6359	15.2935	9.97475	6.12035	3.77945
pollen_02	3.48603	6.7613	12.4159	34.7542	10.9267	17.3305	8.43278	9.37857
pollen_03	3.06484	7.73469	15.6034	32.5002	8.36322	19.1509	9.40258	7.24502
pollen_04	5.23268	9.60342	13.6948	33.6339	7.88554	19.2382	9.276	6.6682
pollen_05	0.790418	4.37049	1.34355	44.5601	12.4242	9.30864	15.1741	12.8189
pollen_06	2.97729	3.90596	2.66272	42.3404	13.9804	10.9215	12.3288	13.8602
pollen_07	2.06846	6.51973	11.4347	37.9472	12.0837	11.5793	9.49989	10.9355
pollen_08	4.15413	7.74828	13.631	28.0402	11.3554	23.8872	7.67561	7.66231
pollen_09	4.07556	8.31015	12.9933	34.407	10.166	15.7765	12.1698	6.17724
pollen_10	2.69704	6.75177	7.5357	37.8222	13.1714	10.6954	10.593	13.4304
pollen_11	1.92716	5.83916	8.80976	34.2111	19.1685	11.1669	9.14215	11.6624
pollen_12	3.18968	6.99309	12.5547	32.0391	13.4689	16.4177	8.58004	9.94641
pollen_13	2.0358	5.18373	8.23058	35.3621	17.245	8.88444	11.1742	13.9199
pollen_14	2.50848	6.28602	9.17999	38.423	13.546	12.3395	8.26005	11.9654
pollen_15	1.05249	7.79805	12.6826	34.5592	9.61458	19.418	7.35009	8.5774
pollen_16	3.13306	9.57485	11.1059	35.7398	18.1159	12.4803	6.81502	6.1683
pollen_17	1.67787	1.54898	7.04259	41.3229	29.9271	1.01631	4.17915	14.963
pollen_18	4.90776	8.4449	14.8958	30.9286	9.8751	20.3338	7.215	8.30685
pollen_19	3.00933	7.19732	11.61	32.9583	13.1931	15.2009	10.3418	9.49853
pollen_20	0.592051	7.11708	8.65784	35.9548	20.4502	13.0538	5.43768	9.32865
pollen_21	0.699886	4.37624	9.30162	40.8011	13.0183	9.03645	9.82286	13.6435
pollen_22	4.57617	7.556	12.324	36.1805	11.0098	11.6197	10.4151	10.8949
pollen_23	2.20806	4.63245	13.4776	18.2241	21.1908	17.2844	11.0576	14.133
pollen_24	1.7435	6.08492	6.62212	36.9568	15.2074	10.5706	7.25423	17.3039
pollen_25	1.98914	5.95242	11.5192	36.8614	14.8237	14.8908	9.03739	6.91511
pollen_26	4.10515	5.5872	10.6711	36.3114	12.1995	9.52488	14.0127	11.6931
pollen_27	0.946686	5.74407	11.0328	34.6033	12.7919	11.6406	13.2405	10.9468
pollen_28	1.30635	4.99116	21.6222	28.153	25.7966	6.64121	3.29548	9.50035
pollen_29	0.54004	7.08	8.07133	37.7817	14.2667	10.6994	8.0588	14.042
pollen_30	2.97215	6.95884	8.13799	35.2546	18.2511	14.1505	5.51092	11.7361
hemp_01	2.40189	4.71927	13.2763	46.2662	3.22366	17.1963	6.75668	8.56166
hemp_02	1.95161	5.46009	15.6976	49.774	5.10725	10.5022	8.51576	4.94304
hemp_03	1.41109	5.55637	13.1848	44.2897	10.4893	10.3955	5.40456	10.6797
hemp_04	2.03114	4.85504	11.9276	40.6403	12.5151	14.9912	5.79529	9.27546
hemp_05	1.81809	5.55432	13.9265	40.8521	7.5749	14.1195	7.34749	10.6251
hemp_06	1.03858	4.55863	9.09551	46.8793	5.78969	14.5222	9.02445	10.1301
hemp_07	5.11091	4.25072	12.0074	42.4998	3.95356	21.4784	5.45925	10.3508
hemp_08	3.31774	5.24679	15.1695	40.2764	3.84669	19.7455	6.55912	9.15588
hemp_09	3.20805	6.59752	11.6928	41.312	6.33349	18.367	6.79061	8.90652
hemp_10	2.08882	6.65376	12.7575	37.5923	3.11837	27.0584	5.01877	7.80094
hemp_11	1.99532	3.13603	10.2671	45.6677	5.455	19.1027	5.37692	10.9946
hemp_12	3.92376	6.86641	15.921	37.8833	5.63231	23.235	3.72095	6.74102
hemp_13	1.70371	3.09623	13.5461	41.105	8.25151	16.1318	7.86531	10.0041
hemp_14	1.77167	6.04081	11.3434	42.0883	8.6055	17.5893	6.28211	8.05058
hemp_15	1.53385	1.9101	10.5196	43.0638	9.08082	20.6558	3.62474	11.1452
hemp_16	1.37091	0.368095	0.276459	45.2242	25.1258	7.93896	11.0754	9.99109
hemp_17	1.9198	4.58527	14.1345	47.7433	3.70903	15.143	6.65937	8.02556
hemp_18	0.870432	4.8988	14.8147	42.2726	8.70387	17.4386	6.59631	5.27513
hemp_19	2.15745	1.30025	9.8838	47.0069	8.96056	13.2599	8.01288	11.5758
hemp_20	1.73263	1.26967	7.13319	24.824	2.17065	4.43703	54.461	5.70447
hemp_21	2.25189	1.62944	9.80222	46.6732	11.4181	9.10939	7.35192	14.0157
hemp_22	3.43379	6.32737	14.3728	41.1975	8.58763	16.589	5.06028	7.86549
hemp_23	2.01209	2.21188	8.79937	36.2444	10.3013	14.3624	15.4708	12.6099
hemp_24	1.60981	2.2398	6.0652	39.4486	18.4848	13.8308	8.94077	10.9899
hemp_25	3.04719	4.30092	11.229	42.3093	6.70776	21.3905	6.70071	7.36182
hemp_26	3.12353	4.60102	9.87497	47.8185	6.69682	11.7243	8.58718	10.6973
hemp_27	1.12716	4.20546	10.7506	43.9983	6.76199	16.9787	8.68004	8.6248
hemp_28	1.52524	4.79538	10.6751	43.3104	7.8691	18.0101	4.73922	10.6007
hemp_29	0.981706	0.577469	7.14141	55.8999	8.75242	9.91323	5.25741	12.4581
hemp_30	2.15828	4.26191	12.5889	43.7914	6.45744	18.9398	5.04319	8.91747

## Sheet: chemistry2_regeneration
animal ID	group ID	resource	reg_yes	reg_no
1	I	blut	0	1
1	I	chlor	0	1
1	I	fungi	0	1
1	I	hanf	1	0
1	I	hefe	1	0
1	I	knochen	1	0
1	I	lupine	0	1
1	I	pollen	1	0
1	I	spiru	1	0
1	I	weizen	1	0
2	I	blut	0	1
2	I	chlor	0	1
2	I	fungi	0	1
2	I	hanf	1	0
2	I	hefe	1	0
2	I	knochen	1	0
2	I	lupine	0	1
2	I	pollen	1	0
2	I	spiru	0	1
2	I	weizen	1	0
3	I	blut	0	1
3	I	chlor	1	0
3	I	fungi	0	1
3	I	hanf	1	0
3	I	hefe	1	0
3	I	knochen	1	0
3	I	lupine	1	0
3	I	pollen	1	0
3	I	spiru	1	0
3	I	weizen	1	0
4	I	blut	0	1
4	I	chlor	0	1
4	I	fungi	1	0
4	I	hanf	0	1
4	I	hefe	1	0
4	I	knochen	0	1
4	I	lupine	1	0
4	I	pollen	1	0
4	I	spiru	1	0
4	I	weizen	1	0
5	I	blut	0	1
5	I	chlor	0	1
5	I	fungi	1	0
5	I	hanf	0	1
5	I	hefe	1	0
5	I	knochen	0	1
5	I	lupine	1	0
5	I	pollen	1	0
5	I	spiru	1	0
5	I	weizen	1	0
1	II	blut	0	1
1	II	chlor	0	1
1	II	fungi	1	0
1	II	hanf	1	0
1	II	hefe	1	0
1	II	knochen	1	0
1	II	lupine	1	0
1	II	pollen	1	0
1	II	spiru	1	0
1	II	weizen	1	0
2	II	blut	0	1
2	II	chlor	0	1
2	II	fungi	0	1
2	II	hanf	1	0
2	II	hefe	1	0
2	II	knochen	1	0
2	II	lupine	1	0
2	II	pollen	1	0
2	II	spiru	1	0
2	II	weizen	1	0
3	II	blut	0	1
3	II	chlor	0	1
3	II	fungi	0	1
3	II	hanf	1	0
3	II	hefe	1	0
3	II	knochen	1	0
3	II	lupine	0	1
3	II	pollen	1	0
3	II	spiru	1	0
3	II	weizen	1	0
4	II	blut	0	1
4	II	chlor	0	1
4	II	fungi	0	1
4	II	hanf	1	0
4	II	hefe	1	0
4	II	knochen	1	0
4	II	lupine	1	0
4	II	pollen	1	0
4	II	spiru	1	0
4	II	weizen	1	0
5	II	blut	0	1
5	II	chlor	1	0
5	II	fungi	0	1
5	II	hanf	0	1
5	II	hefe	0	1
5	II	knochen	0	1
5	II	lupine	1	0
5	II	pollen	1	0
5	II	spiru	1	0
5	II	weizen	1	0
1	III	blut	0	1
1	III	chlor	1	0
1	III	fungi	0	1
1	III	hanf	1	0
1	III	hefe	1	0
1	III	knochen	0	1
1	III	lupine	1	0
1	III	pollen	1	0
1	III	spiru	1	0
1	III	weizen	1	0
2	III	blut	0	1
2	III	chlor	1	0
2	III	fungi	1	0
2	III	hanf	1	0
2	III	hefe	1	0
2	III	knochen	1	0
2	III	lupine	1	0
2	III	pollen	1	0
2	III	spiru	1	0
2	III	weizen	0	1
3	III	blut	0	1
3	III	chlor	1	0
3	III	fungi	1	0
3	III	hanf	1	0
3	III	hefe	1	0
3	III	knochen	1	0
3	III	lupine	0	1
3	III	pollen	1	0
3	III	spiru	1	0
3	III	weizen	1	0
4	III	blut	0	1
4	III	chlor	1	0
4	III	fungi	1	0
4	III	hanf	1	0
4	III	hefe	0	1
4	III	knochen	1	0
4	III	lupine	1	0
4	III	pollen	1	0
4	III	spiru	1	0
4	III	weizen	1	0
5	III	blut	0	1
5	III	chlor	0	1
5	III	fungi	0	1
5	III	hanf	1	0
5	III	hefe	0	1
5	III	knochen	1	0
5	III	lupine	1	0
5	III	pollen	0	1
5	III	spiru	1	0
5	III	weizen	1	0
1	IV	blut	0	1
1	IV	chlor	0	1
1	IV	fungi	0	1
1	IV	hanf	1	0
1	IV	hefe	1	0
1	IV	knochen	1	0
1	IV	lupine	1	0
1	IV	pollen	1	0
1	IV	spiru	1	0
1	IV	weizen	1	0
2	IV	blut	0	1
2	IV	chlor	1	0
2	IV	fungi	0	1
2	IV	hanf	1	0
2	IV	hefe	1	0
2	IV	knochen	0	1
2	IV	lupine	1	0
2	IV	pollen	1	0
2	IV	spiru	1	0
2	IV	weizen	1	0
3	IV	blut	0	1
3	IV	chlor	1	0
3	IV	fungi	1	0
3	IV	hanf	1	0
3	IV	hefe	1	0
3	IV	knochen	1	0
3	IV	lupine	1	0
3	IV	pollen	1	0
3	IV	spiru	1	0
3	IV	weizen	1	0
4	IV	blut	0	1
4	IV	chlor	1	0
4	IV	fungi	1	0
4	IV	hanf	1	0
4	IV	hefe	1	0
4	IV	knochen	1	0
4	IV	lupine	1	0
4	IV	pollen	1	0
4	IV	spiru	1	0
4	IV	weizen	1	0
5	IV	blut	0	1
5	IV	chlor	1	0
5	IV	fungi	1	0
5	IV	hanf	1	0
5	IV	hefe	1	0
5	IV	knochen	1	0
5	IV	lupine	1	0
5	IV	pollen	1	0
5	IV	spiru	1	0
5	IV	weizen	1	0
1	IX	blut	0	1
1	IX	chlor	0	1
1	IX	fungi	1	0
1	IX	hanf	0	1
1	IX	hefe	1	0
1	IX	knochen	1	0
1	IX	lupine	1	0
1	IX	pollen	0	1
1	IX	spiru	1	0
1	IX	weizen	1	0
2	IX	blut	0	1
2	IX	chlor	0	1
2	IX	fungi	0	1
2	IX	hanf	1	0
2	IX	hefe	1	0
2	IX	knochen	1	0
2	IX	lupine	1	0
2	IX	pollen	0	1
2	IX	spiru	1	0
2	IX	weizen	0	1
3	IX	blut	0	1
3	IX	chlor	0	1
3	IX	fungi	0	1
3	IX	hanf	1	0
3	IX	hefe	0	1
3	IX	knochen	1	0
3	IX	lupine	1	0
3	IX	pollen	0	1
3	IX	spiru	1	0
3	IX	weizen	1	0
4	IX	blut	0	1
4	IX	chlor	0	1
4	IX	fungi	1	0
4	IX	hanf	1	0
4	IX	hefe	1	0
4	IX	knochen	1	0
4	IX	lupine	1	0
4	IX	pollen	1	0
4	IX	spiru	1	0
4	IX	weizen	1	0
5	IX	blut	0	1
5	IX	chlor	0	1
5	IX	fungi	0	1
5	IX	hanf	1	0
5	IX	hefe	1	0
5	IX	knochen	0	1
5	IX	lupine	0	1
5	IX	pollen	1	0
5	IX	spiru	1	0
5	IX	weizen	1	0
6	IX	blut	0	1
6	IX	chlor	0	1
6	IX	fungi	0	1
6	IX	hanf	1	0
6	IX	hefe	1	0
6	IX	knochen	0	1
6	IX	lupine	0	1
6	IX	pollen	1	0
6	IX	spiru	1	0
6	IX	weizen	1	0
7	IX	blut	0	1
7	IX	chlor	0	1
7	IX	fungi	1	0
7	IX	hanf	1	0
7	IX	hefe	1	0
7	IX	knochen	0	1
7	IX	lupine	0	1
7	IX	pollen	0	1
7	IX	spiru	0	1
7	IX	weizen	1	0
8	IX	blut	0	1
8	IX	chlor	1	0
8	IX	fungi	0	1
8	IX	hanf	1	0
8	IX	hefe	1	0
8	IX	knochen	0	1
8	IX	lupine	0	1
8	IX	pollen	0	1
8	IX	spiru	1	0
8	IX	weizen	1	0
9	IX	blut	0	1
9	IX	chlor	1	0
9	IX	fungi	0	1
9	IX	hanf	1	0
9	IX	hefe	0	1
9	IX	knochen	1	0
9	IX	lupine	1	0
9	IX	pollen	0	1
9	IX	spiru	1	0
9	IX	weizen	0	1
10	IX	blut	0	1
10	IX	chlor	0	1
10	IX	fungi	1	0
10	IX	hanf	1	0
10	IX	hefe	1	0
10	IX	knochen	1	0
10	IX	lupine	0	1
10	IX	pollen	0	1
10	IX	spiru	1	0
10	IX	weizen	0	1
11	IX	blut	0	1
11	IX	chlor	1	0
11	IX	hanf	1	0
11	IX	hefe	0	1
11	IX	knochen	0	1
11	IX	lupine	0	1
11	IX	spiru	1	0
11	IX	weizen	1	0
12	IX	blut	0	1
12	IX	chlor	0	1
12	IX	hanf	1	0
12	IX	hefe	1	0
12	IX	knochen	1	0
12	IX	lupine	1	0
12	IX	spiru	0	1
12	IX	weizen	1	0
13	IX	blut	0	1
13	IX	chlor	0	1
13	IX	hanf	1	0
13	IX	hefe	1	0
13	IX	knochen	1	0
13	IX	lupine	0	1
13	IX	spiru	1	0
13	IX	weizen	1	0
14	IX	blut	0	1
14	IX	chlor	0	1
14	IX	hanf	1	0
14	IX	hefe	1	0
14	IX	knochen	1	0
14	IX	lupine	1	0
14	IX	spiru	1	0
14	IX	weizen	0	1
15	IX	blut	0	1
15	IX	chlor	0	1
15	IX	hanf	1	0
15	IX	hefe	1	0
15	IX	knochen	1	0
15	IX	lupine	0	1
15	IX	spiru	1	0
15	IX	weizen	1	0
1	V	blut	0	1
1	V	chlor	1	0
1	V	fungi	1	0
1	V	hanf	1	0
1	V	hefe	1	0
1	V	knochen	1	0
1	V	lupine	1	0
1	V	pollen	1	0
1	V	spiru	1	0
1	V	weizen	1	0
2	V	blut	0	1
2	V	chlor	1	0
2	V	fungi	1	0
2	V	hanf	1	0
2	V	hefe	1	0
2	V	knochen	1	0
2	V	lupine	1	0
2	V	pollen	1	0
2	V	spiru	1	0
2	V	weizen	1	0
3	V	blut	0	1
3	V	chlor	1	0
3	V	fungi	1	0
3	V	hanf	1	0
3	V	hefe	1	0
3	V	knochen	1	0
3	V	lupine	1	0
3	V	pollen	1	0
3	V	spiru	1	0
3	V	weizen	1	0
4	V	blut	0	1
4	V	chlor	1	0
4	V	fungi	1	0
4	V	hanf	1	0
4	V	hefe	0	1
4	V	knochen	1	0
4	V	lupine	1	0
4	V	pollen	1	0
4	V	spiru	1	0
4	V	weizen	1	0
5	V	blut	0	1
5	V	chlor	1	0
5	V	fungi	1	0
5	V	hanf	1	0
5	V	hefe	0	1
5	V	knochen	1	0
5	V	lupine	1	0
5	V	pollen	1	0
5	V	spiru	1	0
5	V	weizen	1	0
1	VI	blut	0	1
1	VI	chlor	1	0
1	VI	fungi	1	0
1	VI	hanf	1	0
1	VI	hefe	1	0
1	VI	knochen	1	0
1	VI	lupine	1	0
1	VI	pollen	1	0
1	VI	spiru	1	0
1	VI	weizen	1	0
2	VI	blut	0	1
2	VI	chlor	1	0
2	VI	fungi	1	0
2	VI	hanf	1	0
2	VI	hefe	1	0
2	VI	knochen	1	0
2	VI	lupine	1	0
2	VI	pollen	1	0
2	VI	spiru	1	0
2	VI	weizen	1	0
3	VI	blut	0	1
3	VI	chlor	1	0
3	VI	fungi	1	0
3	VI	hanf	1	0
3	VI	hefe	1	0
3	VI	knochen	1	0
3	VI	lupine	1	0
3	VI	pollen	1	0
3	VI	spiru	1	0
3	VI	weizen	1	0
4	VI	blut	0	1
4	VI	chlor	1	0
4	VI	fungi	1	0
4	VI	hanf	1	0
4	VI	hefe	1	0
4	VI	knochen	1	0
4	VI	lupine	1	0
4	VI	pollen	1	0
4	VI	spiru	1	0
4	VI	weizen	1	0
5	VI	blut	0	1
5	VI	chlor	1	0
5	VI	fungi	1	0
5	VI	hefe	1	0
5	VI	knochen	1	0
5	VI	lupine	1	0
5	VI	pollen	1	0
5	VI	spiru	1	0
5	VI	weizen	1	0
1	VII	blut	0	1
1	VII	chlor	0	1
1	VII	fungi	1	0
1	VII	hanf	1	0
1	VII	hefe	1	0
1	VII	knochen	1	0
1	VII	lupine	0	1
1	VII	pollen	0	1
1	VII	spiru	1	0
1	VII	weizen	1	0
2	VII	blut	0	1
2	VII	chlor	0	1
2	VII	fungi	0	1
2	VII	hanf	1	0
2	VII	hefe	1	0
2	VII	knochen	0	1
2	VII	lupine	0	1
2	VII	pollen	1	0
2	VII	spiru	1	0
2	VII	weizen	1	0
3	VII	blut	0	1
3	VII	chlor	0	1
3	VII	fungi	1	0
3	VII	hanf	1	0
3	VII	hefe	1	0
3	VII	knochen	0	1
3	VII	lupine	0	1
3	VII	pollen	1	0
3	VII	spiru	1	0
3	VII	weizen	0	1
4	VII	blut	0	1
4	VII	chlor	0	1
4	VII	fungi	1	0
4	VII	hanf	1	0
4	VII	hefe	1	0
4	VII	knochen	0	1
4	VII	lupine	1	0
4	VII	pollen	0	1
4	VII	spiru	1	0
4	VII	weizen	1	0
5	VII	blut	0	1
5	VII	chlor	0	1
5	VII	fungi	0	1
5	VII	hanf	1	0
5	VII	hefe	1	0
5	VII	knochen	1	0
5	VII	lupine	1	0
5	VII	pollen	0	1
5	VII	spiru	1	0
5	VII	weizen	0	1
6	VII	blut	0	1
6	VII	chlor	0	1
6	VII	fungi	0	1
6	VII	hanf	1	0
6	VII	hefe	1	0
6	VII	knochen	1	0
6	VII	lupine	1	0
6	VII	pollen	0	1
6	VII	spiru	0	1
6	VII	weizen	1	0
7	VII	blut	0	1
7	VII	chlor	1	0
7	VII	fungi	1	0
7	VII	hanf	1	0
7	VII	hefe	1	0
7	VII	knochen	1	0
7	VII	lupine	0	1
7	VII	pollen	0	1
7	VII	spiru	1	0
7	VII	weizen	1	0
8	VII	blut	0	1
8	VII	chlor	0	1
8	VII	fungi	0	1
8	VII	hanf	1	0
8	VII	hefe	1	0
8	VII	knochen	1	0
8	VII	lupine	1	0
8	VII	pollen	1	0
8	VII	spiru	1	0
8	VII	weizen	1	0
9	VII	blut	0	1
9	VII	chlor	0	1
9	VII	fungi	1	0
9	VII	hanf	1	0
9	VII	hefe	1	0
9	VII	knochen	0	1
9	VII	lupine	1	0
9	VII	pollen	1	0
9	VII	spiru	0	1
9	VII	weizen	0	1
10	VII	blut	0	1
10	VII	chlor	1	0
10	VII	fungi	1	0
10	VII	hanf	1	0
10	VII	hefe	1	0
10	VII	knochen	1	0
10	VII	lupine	1	0
10	VII	pollen	0	1
10	VII	spiru	1	0
10	VII	weizen	1	0
11	VII	blut	0	1
11	VII	chlor	0	1
11	VII	fungi	1	0
11	VII	hanf	1	0
11	VII	hefe	1	0
11	VII	knochen	0	1
11	VII	lupine	1	0
11	VII	pollen	1	0
11	VII	spiru	1	0
11	VII	weizen	1	0
12	VII	blut	0	1
12	VII	chlor	0	1
12	VII	fungi	0	1
12	VII	hanf	0	1
12	VII	hefe	0	1
12	VII	knochen	1	0
12	VII	lupine	1	0
12	VII	pollen	0	1
12	VII	spiru	1	0
12	VII	weizen	0	1
13	VII	blut	0	1
13	VII	chlor	0	1
13	VII	fungi	1	0
13	VII	hanf	1	0
13	VII	hefe	1	0
13	VII	knochen	0	1
13	VII	lupine	1	0
13	VII	pollen	1	0
13	VII	spiru	1	0
13	VII	weizen	1	0
14	VII	blut	0	1
14	VII	chlor	0	1
14	VII	fungi	1	0
14	VII	hanf	1	0
14	VII	hefe	1	0
14	VII	knochen	0	1
14	VII	lupine	1	0
14	VII	pollen	0	1
14	VII	spiru	0	1
14	VII	weizen	1	0
15	VII	blut	0	1
15	VII	chlor	0	1
15	VII	fungi	1	0
15	VII	hanf	1	0
15	VII	hefe	1	0
15	VII	knochen	1	0
15	VII	lupine	1	0
15	VII	pollen	1	0
15	VII	weizen	0	1
1	VIII	blut	0	1
1	VIII	chlor	0	1
1	VIII	fungi	0	1
1	VIII	hanf	1	0
1	VIII	hefe	1	0
1	VIII	knochen	1	0
1	VIII	lupine	0	1
1	VIII	pollen	0	1
1	VIII	spiru	1	0
1	VIII	weizen	1	0
2	VIII	blut	0	1
2	VIII	chlor	1	0
2	VIII	fungi	0	1
2	VIII	hanf	1	0
2	VIII	hefe	1	0
2	VIII	knochen	0	1
2	VIII	lupine	1	0
2	VIII	pollen	0	1
2	VIII	spiru	1	0
2	VIII	weizen	1	0
3	VIII	blut	0	1
3	VIII	chlor	0	1
3	VIII	fungi	1	0
3	VIII	hanf	1	0
3	VIII	hefe	1	0
3	VIII	knochen	0	1
3	VIII	lupine	1	0
3	VIII	pollen	0	1
3	VIII	spiru	1	0
3	VIII	weizen	0	1
4	VIII	blut	0	1
4	VIII	chlor	0	1
4	VIII	fungi	0	1
4	VIII	hanf	1	0
4	VIII	hefe	1	0
4	VIII	knochen	1	0
4	VIII	lupine	0	1
4	VIII	pollen	1	0
4	VIII	spiru	0	1
4	VIII	weizen	0	1
5	VIII	blut	0	1
5	VIII	chlor	0	1
5	VIII	fungi	1	0
5	VIII	hanf	1	0
5	VIII	hefe	1	0
5	VIII	knochen	1	0
5	VIII	lupine	1	0
5	VIII	pollen	1	0
5	VIII	spiru	0	1
5	VIII	weizen	1	0
6	VIII	blut	0	1
6	VIII	chlor	0	1
6	VIII	fungi	0	1
6	VIII	hanf	1	0
6	VIII	hefe	1	0
6	VIII	knochen	1	0
6	VIII	lupine	0	1
6	VIII	pollen	1	0
6	VIII	spiru	1	0
6	VIII	weizen	1	0
7	VIII	blut	0	1
7	VIII	chlor	0	1
7	VIII	fungi	0	1
7	VIII	hanf	1	0
7	VIII	hefe	1	0
7	VIII	knochen	0	1
7	VIII	lupine	1	0
7	VIII	pollen	0	1
7	VIII	spiru	0	1
7	VIII	weizen	1	0
8	VIII	blut	0	1
8	VIII	chlor	0	1
8	VIII	fungi	0	1
8	VIII	hanf	1	0
8	VIII	hefe	1	0
8	VIII	knochen	0	1
8	VIII	lupine	1	0
8	VIII	pollen	1	0
8	VIII	spiru	1	0
8	VIII	weizen	1	0
9	VIII	blut	0	1
9	VIII	chlor	0	1
9	VIII	fungi	1	0
9	VIII	hanf	1	0
9	VIII	hefe	1	0
9	VIII	knochen	1	0
9	VIII	lupine	1	0
9	VIII	pollen	0	1
9	VIII	spiru	1	0
9	VIII	weizen	0	1
10	VIII	blut	0	1
10	VIII	chlor	0	1
10	VIII	fungi	1	0
10	VIII	hanf	1	0
10	VIII	hefe	1	0
10	VIII	knochen	1	0
10	VIII	lupine	0	1
10	VIII	pollen	0	1
10	VIII	spiru	1	0
10	VIII	weizen	1	0
11	VIII	blut	0	1
11	VIII	chlor	0	1
11	VIII	hanf	1	0
11	VIII	hefe	1	0
11	VIII	knochen	1	0
11	VIII	lupine	1	0
11	VIII	pollen	1	0
11	VIII	spiru	1	0
11	VIII	weizen	1	0
12	VIII	blut	0	1
12	VIII	chlor	0	1
12	VIII	hanf	1	0
12	VIII	hefe	1	0
12	VIII	knochen	0	1
12	VIII	lupine	1	0
12	VIII	pollen	0	1
12	VIII	spiru	1	0
12	VIII	weizen	1	0
13	VIII	blut	0	1
13	VIII	chlor	0	1
13	VIII	hanf	1	0
13	VIII	hefe	1	0
13	VIII	knochen	1	0
13	VIII	lupine	1	0
13	VIII	pollen	0	1
13	VIII	spiru	1	0
13	VIII	weizen	1	0
14	VIII	blut	0	1
14	VIII	chlor	1	0
14	VIII	hanf	1	0
14	VIII	hefe	0	1
14	VIII	knochen	1	0
14	VIII	lupine	0	1
14	VIII	pollen	0	1
14	VIII	spiru	1	0
14	VIII	weizen	1	0
15	VIII	blut	0	1
15	VIII	chlor	0	1
15	VIII	hanf	1	0
15	VIII	hefe	1	0
15	VIII	knochen	1	0
15	VIII	lupine	1	0
15	VIII	pollen	1	0
15	VIII	spiru	0	1
15	VIII	weizen	1	0
1	X	blut	0	1
1	X	chlor	0	1
1	X	fungi	0	1
1	X	hanf	1	0
1	X	hefe	1	0
1	X	knochen	0	1
1	X	lupine	0	1
1	X	pollen	0	1
1	X	spiru	1	0
1	X	weizen	0	1
2	X	blut	0	1
2	X	chlor	0	1
2	X	fungi	1	0
2	X	hanf	1	0
2	X	hefe	1	0
2	X	knochen	1	0
2	X	lupine	1	0
2	X	pollen	1	0
2	X	spiru	1	0
2	X	weizen	1	0
3	X	blut	0	1
3	X	chlor	0	1
3	X	fungi	1	0
3	X	hanf	0	1
3	X	hefe	1	0
3	X	knochen	0	1
3	X	lupine	1	0
3	X	pollen	0	1
3	X	spiru	0	1
3	X	weizen	0	1
4	X	blut	0	1
4	X	chlor	0	1
4	X	fungi	0	1
4	X	hanf	1	0
4	X	hefe	1	0
4	X	knochen	1	0
4	X	lupine	1	0
4	X	pollen	1	0
4	X	spiru	1	0
4	X	weizen	1	0
5	X	blut	0	1
5	X	chlor	0	1
5	X	fungi	1	0
5	X	hanf	1	0
5	X	hefe	0	1
5	X	knochen	1	0
5	X	lupine	0	1
5	X	pollen	0	1
5	X	spiru	1	0
5	X	weizen	1	0
6	X	blut	0	1
6	X	chlor	0	1
6	X	fungi	1	0
6	X	hanf	1	0
6	X	hefe	1	0
6	X	knochen	1	0
6	X	lupine	1	0
6	X	pollen	1	0
6	X	spiru	1	0
6	X	weizen	1	0
7	X	blut	0	1
7	X	chlor	0	1
7	X	fungi	0	1
7	X	hanf	0	1
7	X	hefe	1	0
7	X	knochen	1	0
7	X	lupine	1	0
7	X	pollen	0	1
7	X	spiru	1	0
7	X	weizen	1	0
8	X	blut	0	1
8	X	chlor	1	0
8	X	fungi	1	0
8	X	hanf	1	0
8	X	hefe	1	0
8	X	knochen	1	0
8	X	lupine	0	1
8	X	pollen	1	0
8	X	spiru	1	0
8	X	weizen	1	0
9	X	blut	0	1
9	X	chlor	0	1
9	X	fungi	0	1
9	X	hanf	1	0
9	X	hefe	1	0
9	X	knochen	1	0
9	X	lupine	1	0
9	X	pollen	1	0
9	X	spiru	1	0
9	X	weizen	1	0
10	X	blut	0	1
10	X	chlor	1	0
10	X	fungi	0	1
10	X	hanf	1	0
10	X	hefe	1	0
10	X	knochen	0	1
10	X	lupine	0	1
10	X	pollen	1	0
10	X	spiru	1	0
10	X	weizen	0	1
11	X	blut	0	1
11	X	chlor	0	1
11	X	fungi	0	1
11	X	hanf	1	0
11	X	hefe	1	0
11	X	knochen	1	0
11	X	lupine	1	0
11	X	pollen	0	1
11	X	spiru	1	0
11	X	weizen	0	1
12	X	blut	0	1
12	X	chlor	0	1
12	X	fungi	1	0
12	X	hanf	0	1
12	X	hefe	1	0
12	X	knochen	0	1
12	X	lupine	1	0
12	X	pollen	0	1
12	X	spiru	1	0
12	X	weizen	1	0
13	X	blut	0	1
13	X	chlor	0	1
13	X	fungi	0	1
13	X	hanf	1	0
13	X	hefe	1	0
13	X	knochen	0	1
13	X	lupine	1	0
13	X	pollen	0	1
13	X	spiru	1	0
13	X	weizen	0	1
14	X	blut	0	1
14	X	chlor	0	1
14	X	fungi	1	0
14	X	hanf	0	1
14	X	hefe	0	1
14	X	knochen	0	1
14	X	lupine	1	0
14	X	pollen	1	0
14	X	spiru	1	0
14	X	weizen	1	0
15	X	blut	0	1
15	X	chlor	0	1
15	X	fungi	1	0
15	X	hanf	1	0
15	X	hefe	1	0
15	X	knochen	1	0
15	X	lupine	0	1
15	X	pollen	0	1
15	X	spiru	1	0
15	X	weizen	0	1

## Sheet: morphology1_mass
ID	reproductive output (mg)	body mass (µg)
blood	0	7
blood	0	17
blood	0	9
blood	0	13
blood	0	11
blood	0	9
blood	0	5
blood	0	4
blood	0	7
blood	0	7
blood	0	3
blood	0	7
chlor	1297	23
chlor	421	24
chlor	18	0
chlor	622	31
chlor	396	33
chlor	434	26
chlor	311	26
chlor	91	11
chlor	12	12
chlor	305	34
chlor	709	23
chlor	379	29
chlor	501	32
chlor	0	30
chlor	0	31
chlor	0	35
chlor	0	26
chlor	0	28
chlor	0	31
chlor	0	37
chlor	0	39
hemp	492	27
hemp	509	26
hemp	452	18
hemp	1179	18
hemp	1055	25
hemp	109	18
hemp	823	23
hemp	565	25
hemp	188	19
hemp	1759	19
hemp	902	21
hemp	25	13
hemp	3528	18
hemp	1626	21
hemp	717	14
hemp	1745	14
hemp	1223	13
hemp	1299	14
hemp	3500	17
hemp	2237	20
hemp	94	16
hemp	169	15
hemp	1418	13
yeast	1607	42
yeast	1189	21
yeast	2190	25
yeast	1118	23
yeast	2038	25
yeast	1608	24
yeast	1529	27
yeast	938	25
yeast	528	21
yeast	1849	26
yeast	1764	26
yeast	2739	28
yeast	1207	28
yeast	739	31
yeast	1599	19
yeast	560	19
yeast	1045	11
yeast	777	17
yeast	1069	17
yeast	505	43
yeast	587	15
yeast	991	40
yeast	999	15
yeast	1461	11
yeast	958	34
bone	1111	13
bone	635	15
bone	585	22
bone	219	20
bone	92	13
bone	2098	15
bone	2945	16
bone	855	16
bone	564	13
bone	57	16
bone	66	28
bone	181	15
bone	1556	18
bone	92	0
bone	321	22
bone	82	15
bone	78	11
bone	199	19
bone	2848	21
bone	94	16
bone	289	20
bone	916	26
lupine	762	22
lupine	1466	17
lupine	1374	20
lupine	1990	17
lupine	1311	16
lupine	1136	17
lupine	1923	15
lupine	496	28
lupine	2250	13
lupine	1094	21
lupine	1004	19
lupine	1008	14
lupine	1775	15
lupine	773	14
lupine	1616	13
lupine	1086	15
lupine	1585	17
lupine	1314	17
lupine	2986	19
lupine	1991	13
lupine	1533	14
lupine	1509	17
fungi	99	15
fungi	152	16
fungi	75	9
fungi	21	20
fungi	32	25
fungi	63	13
fungi	70	14
fungi	70	17
fungi	216	20
fungi	263	10
fungi	265	19
fungi	488	21
fungi	129	10
fungi	179	10
fungi	129	8
fungi	144	15
fungi	349	14
fungi	126	14
fungi	24	15
pollen	175	14
pollen	560	10
pollen	513	11
pollen	1331	23
pollen	384	19
pollen	287	19
pollen	2626	7
pollen	571	21
pollen	915	20
pollen	962	12
pollen	576	10
pollen	584	9
pollen	435	9
pollen	45	13
pollen	113	10
pollen	2237	8
pollen	1320	13
pollen	717	11
pollen	292	11
pollen	859	13
pollen	477	13
pollen	330	10
pollen	1265	15
pollen	1048	13
pollen	49	34
spiru	1061	17
spiru	82	11
spiru	198	14
spiru	1115	19
spiru	97	31
spiru	1387	22
spiru	0	16
spiru	0	16
spiru	0	17
spiru	0	22
spiru	0	21
spiru	0	18
spiru	0	16
spiru	0	20
wheat	1136	13
wheat	2203	8
wheat	1278	23
wheat	573	16
wheat	1312	11
wheat	4032	9
wheat	879	13
wheat	2805	12
wheat	2347	11
wheat	2203	13
wheat	3954	9
wheat	1113	15
wheat	2416	15
wheat	1345	14
wheat	4337	12
wheat	2858	16
wheat	2049	17
wheat	709	20
wheat	2276	18
wheat	2715	16
wheat	1772	14
wheat	2090	14
wheat	3514	14
wheat	2958	11
wheat	2260	15

## Sheet: morphology2_morphometry
ID	NL (µm)	Nw1 (µm)	Nw2 (µm)	PL (µm)	Bd (µm)	GL (µm)	Gw1 (µm)	Gw2 (µm)	AL (µm)	Aw1 (µm)	Aw2 (µm)
blood_1	612.5	514.3	349.2	173.3	203.8	163.5	100.3	75.2	200	35.9	60.3
blood_3	577.4	517.1	358.3	214.7	202.4	141.7	108.2	80.7	211	46.6	61
blood_4	464.7	517.6	337.3	223.1	210.4	128.5	104.6	77.2	221.8	44.2	71.8
blood_5	684.2	516.3	345.2	112.4	171.6	163.1	132.1	94.1	250.4	57.5	80.5
blood_6	488.1	572.8	384.5	232.2	249.7	163.2	127.3	73.8	230.5	54.9	92.2
blood_8	698	559.1	364.8	151.3	224.3	183.2	131.5	89.3	285.5	68.9	97.1
blood_9	608.6	462.2	362.9	173.7	157.7	148.2	107.6	65	200.6	59.6	86
blood_10	448.5	564.8	356.8	244	210.1	153.7	106.3	76.5	251.3	58.3	96.8
blood_12	591.5	430.2	309.1	117.8	114.5	145	106.5	76.7	196.7	44.2	86.2
blood_13	669.7	558.1	391	182.6	228.1	143.7	120.6	92.8	232.2	56.9	87.3
blood_14	445.8	511.8	340.8	196.7	205	149.8	130	88	209.8	59.9	81.2
blood_15	682.1	554.9	410.5	150.3	176.3	161.1	138.1	92.7	265	42	72.4
blood_18	628.6	508.8	385.1	123.2	173.1	141.1	77.7	55	168.5	40.7	63.2
blood_19	644	538.6	281.5	111.5	203.1	160.4	124.5	90.1	232.9	46.7	71.1
blood_21	572.6	525.9	374.5	205.8	201.7	167.8	104.2	67	192.3	57.5	77.9
blood_22	530.1	514.5	369.2	200.3	205.3	158.4	120.2	84.4	164.4	47.6	65.9
blood_23	472.3	503.3	317.8	186.6	195.5	166.2	100.4	65.8	198.6	53.8	74.8
blood_24	585.6	490	359	152.5	195.2	144.7	69.4	46.6	191.8	47.2	90.9
chlor_1	787.3	619.9	430.9	169.1	192.5	185.6	135.5	108.8	297.7	57.5	98.1
chlor_2	639.2	641.8	410.7	182.5	226.7	142.5	115.4	72.8	287.6	50.1	101
chlor_5	611.2	639.5	486	238.9	238.1	191.1	128.5	84.6	292.8	46.2	75.9
chlor_6	671.9	637.4	491	226.9	219.2	184.8	101.8	68.1	281.9	44.1	83.9
chlor_7	755.7	631.7	456.5	109.7	223.1	188.1	94	65.3	257.1	48.1	89.5
chlor_8	820.9	719.3	565.7	209.8	223.9	213.8	148	96.5	307.1	69.7	104.9
chlor_9	687.4	585.3	399.6	157.7	216.6	167.2	99.1	71.9	227.4	55.3	84.4
chlor_10	619	691.2	422.9	219.6	239.8	203	124.8	77.7	350.3	66.1	103.9
chlor_11	684.5	665	496	226.1	246.9	176.2	110.5	60.4	319	41.6	93.2
chlor_13	682.1	656.9	431.4	245.2	204.8	206.7	122.9	77.5	290.9	53.2	68.2
chlor_15	857.4	670.6	480.7	133.4	188.5	196.5	110.5	62.8	302.2	45.5	87
chlor_16	858.7	804.8	580.1	223.2	265.5	211.8	161.2	93.5	352	67.7	101.1
chlor_17	682.9	641.6	426.7	208.5	221.6	173.3	126.6	72.4	254.5	64.3	79.2
chlor_19	837.3	714.7	459.4	135.5	245.3	206.7	90.2	53.3	303.1	58.7	101.8
chlor_20	914.2	794.9	513.2	211	225.5	210.8	171.9	81.1	340.6	61.1	105.9
chlor_21	663.6	568.5	359.7	154.4	198.8	136.8	90	57.5	212.5	55.5	97.5
chlor_22	628	558.5	341.6	166.7	209.2	151.9	115.4	86.7	183	60.4	87.3
chlor_23	520.5	613.8	375	242.3	210.6	154.3	98.8	65.6	221.3	69	113.1
chlor_24	695.5	595.7	348.6	180.3	202	166.6	138.1	86.7	237	55.5	88.7
chlor_25	662.4	548.6	339.3	90.3	202.1	162.4	127.3	56.2	192.2	58.9	99.5
hemp_1	756.4	326.4	374	126	170.7	175.6	96.6	70.5	239.5	50.9	110.8
hemp_2	759.4	602.5	396.6	153.2	170.1	169.1	101.8	59.5	269.5	68.2	91.6
hemp_3	660.9	612.6	366	177.3	213.3	176.4	120.6	72.8	270.2	74.4	109.7
hemp_4	738.4	610.1	377.9	159	181	146.9	116.5	76.5	259.9	76.5	104.2
hemp_7	716	591.3	402.8	93.6	231.2	153	99.5	54.9	182.7	73.8	111.1
hemp_8	748.8	609.3	435.9	237.9	213.9	170	105.8	85.4	268.4	62	83
hemp_9	595.2	480.5	371.8	130.3	204.5	137.4	113	67.8	233.5	58.9	102.2
hemp_12	728.8	583.2	431.4	136.2	229.1	144.7	112.6	83.9	226.5	51.2	91.7
hemp_13	590.2	490.8	359.1	84.7	128.7	152.8	84.6	64.3	202.5	49.4	86.2
hemp_14	689	624.6	374.2	201.8	206.8	157.5	111.4	80.2	277.4	65.1	104.3
hemp_15	678.8	540.8	362.2	118.9	199	161.7	116.3	76.5	246.3	73.2	109.3
hemp_16	679	556	408.8	165.4	220	157.1	87.2	54	282.3	57.2	92.4
hemp_17	689.1	594.3	439.2	147.3	160.4	154.6	78.5	56.9	253.9	80.6	89.4
hemp_18	581.2	530.6	394.6	192.5	185.2	162.7	99.4	78.3	271.3	101.6	108.1
hemp_20	574.8	620.9	387	191.9	224	168.6	111.6	76.4	307.3	86.4	103.4
hemp_21	701.5	571.5	377.7	131.5	220.4	193.6	122.5	85.3	251.8	53.5	91.6
hemp_22	509.8	537.4	366.5	162.8	158.5	137.4	81.2	57.6	275.5	30.5	64.4
hemp_23	552.3	561.2	363.4	146.9	203.7	205.6	110.7	77.7	276.7	52	80.9
hemp_24	624.7	555.7	347.3	190.6	223.6	169.9	96.9	50.1	244.5	42.7	87.3
hemp_25	492.5	578.5	346.2	222.7	291.4	176.4	114.4	75.2	255.9	43.8	112
yeast_1	769.2	605.9	408.7	72	200.5	172.6	137.1	99.9	288.2	67.5	109.2
yeast_4	428.7	511.5	390.7	202.1	191.2	159.1	101.6	51.5	221.3	40	95.4
yeast_6	595.7	471.2	288.3	136.8	150.5	138.3	74.9	50	272.7	57.6	103.2
yeast_7	549.1	477.2	339.2	159.3	158.2	124.4	70.9	44.2	240.6	53.7	97.3
yeast_8	682.2	652.1	384.9	184.1	193.5	177.7	126.5	90.8	324.1	68.1	76
yeast_9	560.2	543.4	360.3	168.1	196.9	173.4	92.7	49.9	231.6	54.9	61
yeast_10	508.3	612	381.5	257.1	172.1	157.4	126.1	95.5	286.5	55	121.5
yeast_11	639.1	504.7	337.7	142.4	168.5	125.5	90.3	61.6	153.4	40.1	70.6
yeast_12	656.1	646	452.6	184.4	191.3	169.3	86.9	62.7	300	62.7	106.5
yeast_13	677.1	579.8	381.8	58.9	112.7	154.1	104.7	59.6	240.4	44.8	85.1
yeast_14	680.7	540.2	334.6	109.7	161.5	161.3	128.9	66.9	253.9	56.7	96.7
yeast_15	554.2	583.3	335.3	178.5	156.7	153.5	107.8	61.6	289.5	64.2	96.3
yeast_16	490.4	549.6	353.7	167.2	191.5	171.7	113	77	284.8	55.6	96.6
yeast_18	601.2	539.1	354.5	132.9	156.2	150.1	91.1	46.4	228.4	41.7	81.3
yeast_19	555.9	406.2	270.9	137	142.1	171.5	103.5	69.1	169.6	37	83.5
yeast_20	659	565.8	370.6	166.5	168.6	154.8	138.5	73.9	265.5	60.6	69.8
yeast_21	608.5	500.2	364.3	170.9	192.3	163.5	131.1	79.2	185.8	54.4	103.3
yeast_22	541	534.7	346.2	146	150.6	156.9	122.8	68	258.3	48.6	84.8
yeast_23	684.9	572.6	350.6	127.3	162.3	168.8	121.2	77.9	281.6	46.7	79.9
yeast_24	560.6	452	333.7	191.4	128.4	144.7	136	86.8	192.6	63.8	96.3
bone_1	660.6	564.3	397.1	105.9	244.1	144.9	105.2	75.1	207.9	45.4	65.9
bone_3	627.9	622.6	438.9	213.7	239.8	200.6	168.2	87.4	246.6	54	97.9
bone_4	635.7	568.5	375	166.8	225.6	175.1	152.1	101.3	230.1	57	86.7
bone_5	710.9	612.2	414.3	139.1	237.9	184.8	101.8	78.3	208	48.7	55.5
bone_6	691.6	578	358.1	179.9	140.1	169.5	161.1	103.1	250.4	41.4	95.5
bone_7	662.5	555.1	373.5	135.4	215.3	171.4	156.3	98.1	227.4	62.3	102.9
bone_8	647.7	516.7	366.6	101.1	147.9	161.8	124	93.7	244.3	59.6	92.8
bone_9	506.8	517.9	289.8	206.7	215.9	167.2	119.2	87.4	242.9	69	97.5
bone_10	652.5	570.3	352.3	107.2	202.4	176	117.2	61.6	203	52.2	87.3
bone_11	649.6	587.2	365.7	227.7	202.7	192.3	133.6	84.1	256.7	65	115.7
bone_12	672.2	592.6	419.1	133.6	218.8	162	140.1	87.5	223.9	79.6	103.7
bone_13	622.7	525	383.7	149.4	187.6	154.5	131.9	90.1	240.9	77.9	104.3
bone_15	570.6	557.2	345.8	186.8	169.9	161.8	98.1	55.5	218.1	37.9	71.8
bone_16	619.3	555.6	405.6	196.2	256.2	165.4	108.6	65.4	204.4	46	57.5
bone_18	685.7	587.5	431.4	131.5	228.9	162.4	122.5	74.5	235.3	40	67.8
bone_19	691.4	592.5	341.7	77.8	205.7	172.4	135.7	94.8	237.7	82.3	92.4
bone_20	619.3	531.6	365.5	180.3	207.3	172	149	85.4	228.2	63.6	97.5
bone_21	567	519.5	339.6	185.1	181.2	156.8	115.1	65.7	215.9	62.9	104.9
bone_22	723.8	570.6	375.8	167.9	214.1	184.8	152.3	90	265.2	63.6	119.1
bone_23	775.2	640.7	373.7	122.9	236	172.8	113.2	70.6	192.7	53.2	84.9
bone_24	583.2	538.9	342.5	211.4	203.1	157.7	112.6	69.8	221.3	45.4	77.9
bone_25	664.1	626.6	394.7	211	232.8	172.6	135.6	79.9	226.9	60.9	80.6
lupine_1	569.2	566.5	387.2	192.2	204.9	157	141.9	99.7	264	54.2	92.7
lupine_2	760.4	622.3	400.7	135.6	179.7	195.8	171.4	84.3	254.9	59.8	91.3
lupine_3	672.6	552.4	354.3	133.3	203	156.4	121.3	75	269.4	50.5	56.3
lupine_4	730.3	582.5	368	123	220	150.5	107	62.4	268.6	37.4	74.6
lupine_5	635	551.2	363.3	153.7	205.9	165.4	134.7	86	226.1	56.2	90.1
lupine_6	639.5	534.8	407.1	165.8	217.1	152.3	96.8	75.9	270	63	88.6
lupine_7	537.5	607.3	387.5	237.1	232.6	161.1	113.6	70	214.8	49	103.1
lupine_8	534.3	518.5	303.7	230.7	198.4	169.9	113.8	83.1	254.1	52.3	92.9
lupine_9	701.6	563.7	447.9	95.9	169.9	171.6	147.7	86.6	242.7	58.2	90.1
lupine_10	713.4	555.7	429.6	194.9	195	163.6	120.8	88.5	270	54	108.8
lupine_12	676.13	541.1	390.5	77.6	243.7	181.4	92.1	55.2	199.9	47.3	70.8
lupine_13	727.1	598.7	408.3	109.5	188.9	178.7	120.7	83.8	288.1	65.1	80.6
lupine_14	528.1	530.7	353.3	183.8	207.8	178.5	124.7	94.2	200.7	46.8	81.4
lupine_15	672.8	552.5	376	117.2	208.8	159.1	119.8	75.3	221.1	50.1	84.5
lupine_16	620	497.2	354.4	137.7	191.6	137.7	90.2	53.5	190.1	54.2	70.4
lupine_17	645.3	518	310.6	121.5	217.4	140.2	120.5	60.3	227.5	51.5	79.9
lupine_18	702.7	550	338.6	102.2	161.1	166.2	117.4	72.1	227.9	55.6	79.1
lupine_19	701.7	504.6	324.2	74.7	134.8	155.2	101.7	62.8	251.8	52.9	83.6
lupine_20	597.6	609.6	417	165.5	237	197.4	142.7	70	304	63.4	77.8
lupine_22	599.4	506.2	308.6	128	184.2	148.2	106.3	61.7	213.2	37.2	71.8
lupine_23	522.8	531.5	360.4	190.2	219.1	146.4	133.4	82.6	237.8	59.9	75.1
lupine_24	622	529	366.9	143.9	168.2	115.4	84.7	60.5	251.1	36.9	51.6
lupine_25	687.5	538.2	376.6	114	210.6	160.6	134.7	76	275.7	59.5	82.3
fungi_1	516.8	530.8	286.8	161.6	132.3	134.1	97.8	54.2	201.7	36.2	53
fungi_2	558.5	512.4	377.1	124.4	123.9	134	77.1	46	149	37.4	43.2
fungi_3	558	516.9	274.5	195.6	141.8	155	98.2	58.2	253.3	47.4	75.2
fungi_4	487.7	520.5	318.6	186.6	157.4	124	108.5	59.1	254.7	68.6	113
fungi_5	391.3	410.9	292.9	196.7	128.8	141.5	120.4	74.9	186.1	37.9	64.4
fungi_6	495.4	572.6	358.1	211.9	173.2	140.8	119.4	88.7	259.2	40	79.9
fungi_8	479.8	512.4	334	179.6	173.7	140.9	105.6	61.6	257.2	45.5	91.6
fungi_10	470.9	382.4	243.8	116.5	132.5	92.7	58.4	35.9	159.2	28.9	49.3
fungi_11	482.6	410	291.9	137.1	147.6	115.1	77.4	42.8	222.1	53.4	81.3
fungi_13	544.1	529.8	291.1	120.3	176.9	134.1	103.9	64.7	165	46.8	71.5
fungi_14	540.4	485.4	281.4	105	107.3	129.4	95.6	44.7	216.9	48.4	76.1
fungi_15	514.3	478.2	332.3	195.2	148.9	140.1	117.2	78.6	260.3	44	78.5
fungi_16	584.8	538	333.4	190.3	193.6	143.6	111	69	256.6	40	79.3
fungi_17	470.9	589.4	287.5	224.1	195.8	151.1	124.2	64.5	238.2	52.5	76.1
fungi_18	532.1	509.1	264.6	142.7	119.4	135.4	98.8	60.1	205.6	42.2	59
fungi_20	389.7	513.2	278.8	220.3	161.3	158.6	131.1	82.7	169.2	52.3	89.7
fungi_21	435.5	554.8	317.6	217.3	190.4	144.2	140.1	82	235.6	58.3	78
fungi_22	517.2	393	277.4	90.1	135.7	135.8	75.6	51.8	197.2	44.6	59.2
fungi_23	521.3	611.8	284.5	210.2	167.8	153.4	144.5	89.5	235.2	42.7	80.6
pollen_1	639.1	538.9	394.5	148.1	241.6	169.2	149.6	81.5	251.1	38.1	69
pollen_2	609.6	486.6	347.5	35.5	204.5	134	130	65	120.5	42.7	63.8
pollen_3	668.9	573.9	375.8	143.1	199.2	166.9	90	43.4	274.3	32.5	48.1
pollen_5	619.3	493.2	287.8	107.5	202.7	137.5	119.7	61.6	195.5	33.6	66.4
pollen_7	555.8	471.7	338.5	180	207.8	156.8	106.7	65.4	199.1	35.9	84
pollen_8	637.9	513.2	392.1	153.1	207.3	157.3	101.6	42	224.7	42.8	64.3
pollen_9	601.8	600.4	403.4	182.2	217.9	156.5	124.7	74.5	276.3	36.1	82.7
pollen_10	551.8	493.5	348.1	172.6	210.5	168.8	123.6	73.6	220.8	58.8	90.9
pollen_11	640.7	509.6	340.7	108.8	199.5	168.5	130.6	73.1	176	53.1	94
pollen_12	534	481.1	313.9	147.3	191.7	137.6	89.7	60.4	201	53.8	68.8
pollen_13	563.1	483.1	327	156.4	199.1	155.7	117.8	54.8	207	49.4	77.6
pollen_14	560	536.9	328.6	182	217	164.5	117.8	60.3	228.9	44.7	60.9
pollen_16	597.1	462.9	321.1	130.1	147.5	146.1	109.6	61.7	209.8	38.6	77.7
pollen_17	520	563.8	349.9	224	204.5	165.2	138.6	84.6	257.6	56.4	89.4
pollen_18	634.5	495.7	351.6	133.6	176	152.8	129.6	75.1	225.5	45.3	64.6
pollen_19	628.7	537.7	340	267.3	199.2	157	125.9	75.1	196.1	45.8	72.5
pollen_20	651.8	528.1	379.2	145.5	218.7	150.6	117.3	58.5	268.6	42.6	69
pollen_21	540.5	573.9	347.9	192	218	154.5	119.8	69	237.7	48.7	71.9
pollen_22	658.8	534.5	361	170.7	187.5	140.5	142.5	71.7	228.8	35.9	91.7
pollen_23	565.8	569.2	360.4	186.9	211.7	161.8	154.4	78.9	252	58.2	71.2
pollen_24	570.9	495.4	276	178.8	124	166.9	131.6	76	200.5	42.4	83.8
pollen_25	701.6	589.9	385.7	97.4	187	155	113.1	49.6	236.2	49.6	71.1
spiru_1	668.9	747.8	423.6	268.3	265.5	167.4	142.7	64.3	306	56.5	87.3
spiru_2	648.4	747.7	412.6	306.1	251.3	209.4	162.4	89.3	296.8	73.6	140.9
spiru_3	743.2	545.5	301.7	233.7	98.8	210.9	134.8	90.1	326.2	54.1	64.1
spiru_4	675	723.4	416	241.8	246.2	171.5	130.7	69.9	292.1	48	83.3
spiru_5	789.2	676.6	466.6	137	231.8	179.9	102	61.9	274.8	43.9	85.9
spiru_6	852.7	654.4	432.6	150.8	189.5	184.9	152.7	95.7	279.5	50.9	86.2
spiru_7	690.6	650.3	406.6	253.6	235.1	180.7	93.4	60.9	276.8	50.3	77.2
spiru_9	703.3	630.3	309.4	104	217.3	158.4	103.1	66.3	239.1	46	67.7
spiru_10	513.2	610.5	336.7	274.3	229	173.8	141.9	83	270.1	49.3	90.1
spiru_11	665.6	571.4	348	136.3	220.7	167.8	127.7	83.7	214.7	55.9	108.3
spiru_12	708.5	557.3	280.7	152.3	180.3	169.4	107.7	78.8	241.9	54.9	78.8
spiru_13	670.3	582.8	367.4	187.9	219	176.6	123.9	71.8	242.7	59	86
spiru_14	781.4	660.4	355	129	188	208.5	167.5	131.7	283.5	58	97.1
spiru_15	515.5	593.7	241.6	218.1	209.7	186.2	155.1	83.3	258.6	54.1	90
spiru_16	612	459.4	308	117.1	119.8	162.1	116.3	71.8	217	54.6	89.8
spiru_17	853	669.9	422	156.8	227.2	203.7	148.6	89.4	281.1	56.5	101.1
spiru_19	452.8	531.4	303.7	244.2	198.4	160.5	117.1	71.8	206.7	50.1	62.7
spiru_20	518	559.3	293.2	218.4	203	172.4	149.6	98.4	245.5	57.1	85.1
spiru_21	766.1	574.4	338.3	127.5	179.3	181.7	162.3	106.5	288.5	61.2	100.3
spiru_22	573.3	611.9	262	217.3	200.3	192.7	172.3	101.8	295.8	61.9	103
spiru_23	700.1	616.2	375.6	191.7	220.1	184.2	142.1	84.9	243.7	48.2	90.1
spiru_24	600.5	453.5	255.8	141.4	121.6	158.2	120.2	75.9	227.5	60.8	98.8
spiru_25	891.4	732	459.6	192.4	251.2	209.1	155	115.2	328.8	88.5	109.6
wheat_1	489.1	486.8	349.7	164.3	202.3	125.3	87.3	57.4	196.4	34.8	58.8
wheat_2	516.5	480	339.2	147.1	137.8	141.1	91.5	50.2	197.1	46.8	61.6
wheat_4	564.2	461.7	312.5	135.4	182.8	130.6	94.1	61.6	263	45.5	52.6
wheat_5	616.2	490.3	316.5	138.3	117	167.1	97.5	63.4	197.5	31.9	49.5
wheat_6	649.9	581.4	347.7	175.9	215.9	148.2	118.7	61.6	208.2	50.9	75.3
wheat_8	549.3	494.5	319.2	153.7	185.9	138.1	138.7	62.9	214	42.5	66.7
wheat_9	682.3	519.5	372.9	97.5	157.9	142.8	116.6	69.3	227.1	44.2	86.7
wheat_11	581.4	477.9	309	63.2	124.3	142.5	94.8	65.8	163.4	41.3	68
wheat_12	623.1	643.6	420.5	162.1	230.4	155.2	90.3	65.2	271.4	47.9	79.1
wheat_13	613.1	577.8	378.3	193.4	221.4	173	146.1	72.1	286.7	49.3	84.6
wheat_14	445.3	467	306.3	171.8	179.7	162.8	120.8	67	208.4	43.3	65.8
wheat_16	548.3	440.5	286.4	101.9	141.2	154.6	116	72.3	185.5	43.6	65.8
wheat_21	544.8	486.2	329.3	159.8	193.2	137.5	108.8	65.4	203.9	36.5	49.6
wheat_24	543.2	543	349	201.7	214.6	170	132.7	74	235.7	45.4	80.4
wheat_25	476.4	509.6	295.4	206.3	204.3	152.5	107.7	56.3	222	38.3	65.3

## Sheet: mean_cv_tab
ID	group	dry_weight	gland_amount	regeneration	chemistry	bulk_biomass	mortality	dev_time	numer_offspring	morphology		NGB1	NGB2	PDL	TBA	GPL	GPB1	GPB2	APL	APB1	APB2		HMBD	NER	NYF	C13	ACA	C15	C17		CN
means	blood	8.25	1.88586	0		0.583333	91.6667	NA	0.0833333			91.9797	62.6785	31.7576	34.8743	27.2588	19.6849	13.5932	38.1583	9.08442	13.9483		3.91571	12.8024	35.9802	5.32568	16.3477	11.7788	13.8495		3.27
SD	blood	3.76663	2.04915	0		1.9347	27.6385	NA	0.276385			15.7979	9.73386	11.3685	8.41355	4.21758	4.12476	2.76094	7.18132	2.1227	3.1682		2.64027	8.06926	8.93434	1.54609	4.42194	3.39249	4.8181		3.27
CV	blood	45.6561	108.658	0	39.2798	331.662	30.1511	0	331.662	21.4266		17.1755	15.5298	35.7978	24.1254	15.4723	20.9539	20.3112	18.8198	23.3664	22.7139		67.4275	63.0292	24.8313	29.0308	27.0493	28.8017	34.7889		3.27
means	chlor	26.7143	3.51815	46		261.714	91.5899	55.9107	1.5			91.9658	62.1076	26.8812	31.362	25.618	17.0208	10.6428	38.8378	8.05648	13.2912		6.97422	18.832	28.8491	9.01284	20.7966	11.5697	7.71663		5.39
SD	chlor	9.08239	2.23632	36.5696		327.25	12.854	8.34941	2.84312			10.236	8.16004	8.486	4.77202	3.07814	2.79488	2.14636	6.64048	1.72761	2.5594		11.5717	8.96555	5.2806	4.90812	5.43287	4.22671	5.29665		5.39
CV	chlor	33.9982	63.5654	79.4991	59.6553	125.041	14.0343	14.9335	189.541	17.7454		11.1302	13.1385	31.5686	15.2159	12.0155	16.4204	20.1672	17.098	21.4437	19.2564		165.922	47.6081	18.3042	54.457	26.1238	36.5326	68.6394		5.39
means	hemp	18.5652	2.18	90		1113.65	49.7547	48.6091	13.5			86.9173	59.4727	24.851	31.5202	25.4669	16.1612	10.905	39.7727	9.64121	14.9922		4.04674	11.1931	42.8168	8.15382	15.7573	8.60075	9.4316		5.62
SD	hemp	4.28167	0.970987	13.4164		950.302	28.8534	7.24594	13.5677			14.5872	6.46109	7.78434	7.96184	4.52904	2.81102	2.13741	7.62948	2.70515	2.6273		1.86616	3.26338	5.22099	4.53137	4.86731	8.97517	2.14742		5.62
CV	hemp	23.0629	44.5407	14.9071	43.007	85.3321	57.9914	14.9066	100.502	20.3774		16.7829	10.864	31.3241	25.2595	17.7841	17.3937	19.6002	19.1827	28.0582	17.5245		46.1151	29.1554	12.1938	55.5736	30.8893	104.353	22.7683		5.62
means	yeast	24.52	4.24407	85.3333		1263.76	50.5489	47.8123	22.2			91.5346	60.4367	26.8687	28.4248	26.6816	18.6081	11.5448	41.9641	9.03835	15.4592		6.09729	17.4226	29.9163	7.44679	22.7521	9.96827	6.39663		7.52
SD	yeast	8.49056	2.7417	14.5449		555.95	18.3748	3.40575	10.0319			13.5794	10.1354	10.0294	5.98381	4.34729	3.82856	2.79997	8.68267	1.61772	3.64792		1.23425	4.35297	4.92712	1.67959	3.77609	2.45454	1.46086		7.52
CV	yeast	34.6271	64.6007	17.0449	21.1871	43.9917	36.3506	7.12317	45.189	21.3291		14.8352	16.7703	37.3273	21.0513	16.2932	20.5747	24.2531	20.6907	17.8984	23.597		20.2425	24.9846	16.4697	22.5546	16.5967	24.6235	22.838		7.52
means	bone	16.8182	2.34222	74.6667		721.955	62.8462	68.0255	7.75			88.3709	58.1412	25.3519	32.5817	26.4193	20.1369	12.6963	35.6117	8.98311	13.8887		3.29157	7.52331	38.5237	11.9415	14.2535	12.5268	11.9398		4.18
SD	bone	5.57296	1.07932	15.4344		862.372	31.0558	10.5143	9.87104			5.86483	4.9651	8.01546	4.94099	2.6545	3.15867	2.10816	4.41235	2.14153	2.98048		1.48047	6.51143	10.5007	3.86998	5.08703	3.32235	2.64581		4.18
CV	bone	33.1365	46.0811	20.6711	39.3664	119.45	49.4154	15.4565	127.368	16.1985		6.63662	8.53972	31.6167	15.1649	10.0476	15.686	16.6045	12.3902	23.8395	21.4597		44.9777	86.55	27.2578	32.4079	35.6898	26.5221	22.1597		4.18
means	lupine	16.9545	4.0637	77.3333		1453.73	32.6762	62.7392	18.8182			83.3483	55.9137	22.8902	30.2146	24.2741	18.3073	11.486	37.1564	8.02097	12.4446		4.55253	12.3161	40.9706	9.7853	14.9068	11.9034	9.32341		7
SD	lupine	3.48343	2.17467	17.4356		547.993	29.195	5.12895	11.6214			18.9483	12.9323	10.1236	8.31885	5.96899	5.00821	3.41647	8.85038	2.11034	3.51723		7.71948	15.8016	10.1797	4.87769	6.02179	3.97534	3.58374		7
CV	lupine	20.5457	53.5144	22.546	69.2557	37.6957	89.3465	8.17504	61.7564	27.7706		22.7338	23.1291	44.2266	27.5325	24.59	27.3564	29.7447	23.8193	26.3103	28.2632		169.564	128.301	24.8463	49.8471	40.3964	33.3967	38.4381		7
means	fungi	15	6.49741	58		152.316	85.2579	70.9958	2.08			101.727	60.9054	34.7945	31.066	27.7918	21.5548	13.0063	43.7674	9.28219	14.9874		11.8982	20.1608	34.0335	9.37376	20.6935	12.0259	5.0831		11.26
SD	fungi	4.43669	3.35638	24.5945		117.309	15.6581	6.69551	2.11509			15.4246	8.43078	11.0156	6.52375	4.79541	6.04848	4.01081	7.71621	2.27206	3.95446		29.8472	20.9733	5.83686	7.98705	5.9408	4.94579	6.43108		11.26
CV	fungi	29.5779	51.6573	42.4043	93.3709	77.0172	18.3656	9.43086	101.687	22.631		15.1628	13.8424	31.659	20.9996	17.2548	28.061	30.8373	17.63	24.4776	26.3851		250.855	104.03	17.1504	85.2065	28.7085	41.1263	126.519		11.26
means	pollen	13.92	2.48667	74.3333		746.84	48.5382	57.7972	10.8333			87.4904	58.0681	26.4072	33.2198	26.0182	20.3914	11.1124	37.0909	7.53202	12.4508		6.43629	10.6505	35.1252	14.604	13.2503	9.12943	10.8042		13.59
SD	pollen	5.83726	1.34589	28.2862		621.197	26.3203	8.24269	8.76863			8.87317	5.28742	8.69403	4.95216	2.88924	3.19891	2.338	6.34809	1.71505	2.36223		1.70033	3.85251	4.85083	4.94509	4.65255	2.73182	2.87784		13.59
CV	pollen	41.9343	54.1244	38.0532	28.8476	83.1767	54.2259	14.2614	80.9412	17.3767		10.1419	9.10556	32.9229	14.9073	11.1047	15.6875	21.0395	17.115	22.7702	18.9725		26.4179	36.1721	13.8101	33.8611	35.1128	29.9232	26.6363		13.59
means	spiru	18.5714	7.56371	91.1905		281.429	88.9334	75.0057	3			92.6232	52.5074	29.7426	30.9921	27.3455	20.6543	12.7472	40.1015	8.4945	13.6821		5.02465	10.929	37.4902	10.4367	18.2832	11.9863	6.79983		4.27
SD	spiru	4.69672	10.0476	10.0819		481.013	15.8673	6.4768	4.61224			15.6098	8.10327	12.1672	8.107	4.33716	4.95524	2.93863	6.35981	1.7245	3.10369		4.83074	7.64771	9.79304	6.46043	6.0743	5.15456	4.49566		4.27
CV	spiru	25.29	132.84	11.0558	56.6403	170.918	17.8418	8.63508	153.741	22.1102		16.853	15.4326	40.9084	26.1583	15.8606	23.9914	23.0532	15.8593	20.3014	22.6843		96.141	69.9765	26.1216	61.9013	33.2234	43.0038	66.1144		4.27
means	wheat	13.96	2.89556	86		2205.36	22.2563	59.2811	44.76			91.3737	60.0161	27.5477	32.5375	26.8675	19.9059	11.5311	39.1822	7.67129	12.0213		5.77571	16.0449	35.1715	6.82551	18.0086	10.5186	7.65531		12.39
SD	wheat	3.35237	1.63674	15.0407		1018.99	17.5126	6.70632	26.4987			9.65006	6.32617	8.54034	7.3691	3.88215	3.78116	1.46892	6.08694	1.04476	1.9019		2.08842	8.93118	12.3926	2.18773	5.59943	2.2336	1.84503		12.39
CV	wheat	24.0141	56.5259	17.4892	33.6484	46.2051	78.6858	11.3127	59.2018	16.591		10.5611	10.5408	31.002	22.648	14.4492	18.9952	12.7387	15.535	13.6191	15.8211		36.1587	55.6638	35.2347	32.0522	31.0931	21.2349	24.1013		12.39

## Sheet: Nutrient table
classification		elemental analyses				macronutrients [in µg/mg]
		C/N	C/P	C/Ca		carbohyrates	fat	protein
animal	blood	3.3	541.6	866.6		0	3	622
	bone	4.2	4.4	2		50	91	337
bacterial	spirulina	4.3	38.7	690.1		250	42	395
fungal	shiitake	11.3	53.6	836.2		250	19	102
	yeast	7.5	51.1	417.9		110	23	194
herbal	chlorella	5.4	38.6	192.8		70	30	313
	hemp	5.6	26.2	264.1		260	122	281
	lupine	7	79.1	305.8		100	169	261
	pollen	13.6	119.5	544.4		670	33	95
	wheat	12.4	183.9	176.3		220	12	86
